# Supplementary material for: Does greater individual social capital improve the management of hypertension? Cross-national analysis of 61 229 individuals in 21 countries
Source: PubMed Central journal article supplement (PMC5759715; doi:10.1136/bmjgh-2017-000443), 2017-12-17
Supplement: bmjgh-2017-000443supp002.pdf [file bmjgh-2017-000443supp002.pdf]

Effect of membership of any social organisation on hypertension detection, treatment and control among ALL hypertensives

| VARIABLES           | Hypertension detection  |                      |                                    |                      |                                                              |                      | Hypertension treatment  |                      |                                    |                      |                                                              |                      | Hypertension control    |                      |                                    |                      |                                                              |                      |
|---------------------|-------------------------|----------------------|------------------------------------|----------------------|--------------------------------------------------------------|----------------------|-------------------------|----------------------|------------------------------------|----------------------|--------------------------------------------------------------|----------------------|-------------------------|----------------------|------------------------------------|----------------------|--------------------------------------------------------------|----------------------|
|                     | OLS+individual controls |                      | OLS+individual+ community controls |                      | OLS+individual+ community controls + community fixed effects |                      | OLS+individual controls |                      | OLS+individual+ community controls |                      | OLS+individual+ community controls + community fixed effects |                      | OLS+individual controls |                      | OLS+individual+ community controls |                      | OLS+individual+ community controls + community fixed effects |                      |
|                     | HIC & UMIC              | LMIC & LIC           | HIC & UMIC                         | LMIC & LIC           | HIC & UMIC                                                   | LMIC & LIC           | HIC & UMIC              | LMIC & LIC           | HIC & UMIC                         | LMIC & LIC           | HIC & UMIC                                                   | LMIC & LIC           | HIC & UMIC              | LMIC & LIC           | HIC & UMIC                         | LMIC & LIC           | HIC & UMIC                                                   | LMIC & LIC           |
| Membership          | 0.012<br>(0.008)        | 0.058***<br>(0.013)  | 0.011<br>(0.008)                   | 0.058***<br>(0.014)  | 0.012<br>(0.008)                                             | 0.029**<br>(0.013)   | 0.009<br>(0.007)        | 0.049***<br>(0.013)  | 0.008<br>(0.007)                   | 0.048***<br>(0.014)  | 0.008<br>(0.007)                                             | 0.028**<br>(0.013)   | -0.001<br>(0.005)       | 0.036***<br>(0.009)  | -0.000<br>(0.005)                  | 0.039***<br>(0.010)  | 0.002<br>(0.005)                                             | 0.027***<br>(0.010)  |
| Female              | 0.085***<br>(0.008)     | 0.146***<br>(0.015)  | 0.085***<br>(0.008)                | 0.139***<br>(0.016)  | 0.084***<br>(0.008)                                          | 0.119***<br>(0.016)  | 0.083***<br>(0.008)     | 0.139***<br>(0.014)  | 0.082***<br>(0.008)                | 0.143***<br>(0.016)  | 0.083***<br>(0.008)                                          | 0.120***<br>(0.015)  | 0.072***<br>(0.006)     | 0.062***<br>(0.009)  | 0.072***<br>(0.006)                | 0.065***<br>(0.010)  | 0.072***<br>(0.006)                                          | 0.053***<br>(0.009)  |
| Age                 | 0.030***<br>(0.004)     | 0.031***<br>(0.005)  | 0.031***<br>(0.004)                | 0.035***<br>(0.005)  | 0.030***<br>(0.004)                                          | 0.031***<br>(0.005)  | 0.029***<br>(0.004)     | 0.028***<br>(0.004)  | 0.029***<br>(0.004)                | 0.031***<br>(0.005)  | 0.029***<br>(0.004)                                          | 0.027***<br>(0.005)  | 0.013***<br>(0.003)     | 0.014***<br>(0.003)  | 0.013***<br>(0.003)                | 0.015***<br>(0.004)  | 0.013***<br>(0.003)                                          | 0.012***<br>(0.004)  |
| Age squared         | -0.000***<br>(0.000)    | -0.000***<br>(0.000) | -0.000***<br>(0.000)               | -0.000***<br>(0.000) | -0.000***<br>(0.000)                                         | -0.000***<br>(0.000) | -0.000***<br>(0.000)    | -0.000***<br>(0.000) | -0.000***<br>(0.000)               | -0.000***<br>(0.000) | -0.000***<br>(0.000)                                         | -0.000***<br>(0.000) | -0.000***<br>(0.000)    | -0.000***<br>(0.000) | -0.000***<br>(0.000)               | -0.000***<br>(0.000) | -0.000***<br>(0.000)                                         | -0.000***<br>(0.000) |
| Urban               | 0.006<br>(0.011)        | 0.020<br>(0.021)     | 0.014<br>(0.013)                   | 0.015<br>(0.026)     | -0.079<br>(0.064)                                            | 0.349***<br>(0.061)  | -0.001<br>(0.012)       | 0.021<br>(0.021)     | -0.000<br>(0.014)                  | 0.017<br>(0.026)     | -0.151**<br>(0.058)                                          | 0.305***<br>(0.063)  | 0.012<br>(0.009)        | 0.015<br>(0.014)     | 0.015<br>(0.011)                   | 0.017<br>(0.017)     | -0.067<br>(0.094)                                            | 0.048*<br>(0.028)    |
| Married             | 0.005<br>(0.007)        | 0.024*<br>(0.013)    | 0.005<br>(0.007)                   | 0.029**<br>(0.015)   | 0.000<br>(0.007)                                             | 0.038**<br>(0.015)   | 0.017**<br>(0.008)      | 0.011<br>(0.012)     | 0.017**<br>(0.008)                 | 0.013<br>(0.013)     | 0.014*<br>(0.008)                                            | 0.024*<br>(0.013)    | 0.002<br>(0.006)        | 0.010<br>(0.009)     | 0.000<br>(0.006)                   | 0.009<br>(0.010)     | -0.001<br>(0.006)                                            | 0.019*<br>(0.010)    |
| Secondary education | -0.017*<br>(0.009)      | 0.068***<br>(0.016)  | -0.017*<br>(0.009)                 | 0.060***<br>(0.016)  | -0.014<br>(0.010)                                            | 0.043***<br>(0.016)  | 0.002<br>(0.009)        | 0.074***<br>(0.014)  | 0.005<br>(0.010)                   | 0.064***<br>(0.015)  | 0.009<br>(0.009)                                             | 0.042***<br>(0.013)  | 0.002<br>(0.007)        | 0.042***<br>(0.009)  | 0.001<br>(0.008)                   | 0.042***<br>(0.010)  | 0.002<br>(0.008)                                             | 0.025**<br>(0.010)   |
| Tertiary education  | -0.033***<br>(0.012)    | 0.086***<br>(0.021)  | -0.033***<br>(0.013)               | 0.074***<br>(0.022)  | -0.028**<br>(0.013)                                          | 0.063***<br>(0.021)  | -0.016<br>(0.012)       | 0.074***<br>(0.017)  | -0.011<br>(0.013)                  | 0.086***<br>(0.017)  | -0.008<br>(0.012)                                            | 0.069***<br>(0.015)  | 0.015<br>(0.011)        | 0.072***<br>(0.014)  | 0.017<br>(0.015)                   | 0.073***<br>(0.011)  | 0.019**<br>(0.011)                                           | 0.059***<br>(0.014)  |
| Wealth quintile 2   | 0.045<br>(0.031)        | 0.052***<br>(0.015)  | 0.061**<br>(0.028)                 | 0.053***<br>(0.017)  | 0.030<br>(0.028)                                             | 0.020<br>(0.016)     | 0.029<br>(0.025)        | 0.052***<br>(0.014)  | 0.037<br>(0.025)                   | 0.045***<br>(0.015)  | 0.008<br>(0.024)                                             | 0.023*<br>(0.013)    | 0.016<br>(0.011)        | 0.023**<br>(0.010)   | 0.016<br>(0.013)                   | 0.020*<br>(0.011)    | 0.011<br>(0.014)                                             | 0.007<br>(0.010)     |
| Wealth quintile 3   | 0.079*<br>(0.040)       | 0.094***<br>(0.017)  | 0.097***<br>(0.037)                | 0.089***<br>(0.033)  | 0.059*<br>(0.033)                                            | 0.058***<br>(0.019)  | 0.076**<br>(0.032)      | 0.086***<br>(0.017)  | 0.086***<br>(0.033)                | 0.072***<br>(0.019)  | 0.048<br>(0.029)                                             | 0.054***<br>(0.018)  | 0.034**<br>(0.015)      | 0.043***<br>(0.013)  | 0.033*<br>(0.014)                  | 0.037***<br>(0.014)  | 0.018<br>(0.016)                                             | 0.023*<br>(0.013)    |
| Wealth quintile 4   | 0.072*<br>(0.040)       | 0.106***<br>(0.019)  | 0.087**<br>(0.037)                 | 0.097***<br>(0.019)  | 0.057*<br>(0.033)                                            | 0.069***<br>(0.022)  | 0.064**<br>(0.031)      | 0.119***<br>(0.031)  | 0.073**<br>(0.031)                 | 0.098***<br>(0.023)  | 0.037<br>(0.028)                                             | 0.081***<br>(0.023)  | 0.048***<br>(0.015)     | 0.056***<br>(0.018)  | 0.046***<br>(0.016)                | 0.039**<br>(0.016)   | 0.033**<br>(0.016)                                           | 0.026*<br>(0.015)    |
| Wealth quintile 5   | 0.063<br>(0.041)        | 0.103***<br>(0.025)  | 0.081**<br>(0.037)                 | 0.096***<br>(0.027)  | 0.057*<br>(0.034)                                            | 0.067**<br>(0.027)   | 0.057*<br>(0.031)       | 0.118***<br>(0.028)  | 0.067**<br>(0.031)                 | 0.100***<br>(0.032)  | 0.035<br>(0.028)                                             | 0.079***<br>(0.029)  | 0.038**<br>(0.016)      | 0.058**<br>(0.022)   | 0.036**<br>(0.017)                 | 0.040*<br>(0.022)    | 0.024<br>(0.017)                                             | 0.024<br>(0.022)     |
| Tobacco user        | 0.008<br>(0.009)        | -0.010<br>(0.013)    | 0.006<br>(0.009)                   | -0.011<br>(0.014)    | 0.004<br>(0.009)                                             | -0.003<br>(0.014)    | 0.003<br>(0.008)        | 0.000<br>(0.012)     | 0.001<br>(0.008)                   | 0.004<br>(0.013)     | 0.000<br>(0.008)                                             | 0.008<br>(0.013)     | 0.016***<br>(0.005)     | 0.017**<br>(0.009)   | 0.018***<br>(0.006)                | 0.020*<br>(0.010)    | 0.017***<br>(0.006)                                          | 0.018*<br>(0.010)    |
| Alcohol user        | -0.041***<br>(0.010)    | 0.028**<br>(0.013)   | -0.042***<br>(0.011)               | 0.031**<br>(0.015)   | -0.033***<br>(0.012)                                         | 0.007<br>(0.015)     | -0.054***<br>(0.009)    | 0.017<br>(0.014)     | -0.055***<br>(0.010)               | 0.021<br>(0.015)     | -0.047***<br>(0.011)                                         | -0.001<br>(0.014)    | -0.032***<br>(0.006)    | 0.001<br>(0.011)     | -0.033***<br>(0.006)               | 0.006<br>(0.012)     | -0.028***<br>(0.006)                                         | -0.006<br>(0.011)    |
| Diabetes            | 0.273***<br>(0.014)     | 0.235***<br>(0.014)  | 0.266***<br>(0.014)                | 0.214***<br>(0.014)  | 0.261***<br>(0.014)                                          | 0.196***<br>(0.014)  | 0.279***<br>(0.013)     | 0.225***<br>(0.013)  | 0.276***<br>(0.014)                | 0.215***<br>(0.014)  | 0.272***<br>(0.014)                                          | 0.198***<br>(0.015)  | 0.092***<br>(0.010)     | 0.079***<br>(0.010)  | 0.080***<br>(0.010)                | 0.077***<br>(0.011)  | 0.076***<br>(0.010)                                          | 0.071***<br>(0.011)  |
| Depressed           | 0.070***<br>(0.007)     | 0.070***<br>(0.012)  | 0.075***<br>(0.007)                | 0.077***<br>(0.012)  | 0.076***<br>(0.008)                                          | 0.087***<br>(0.011)  | 0.052***<br>(0.008)     | 0.057***<br>(0.011)  | 0.055***<br>(0.008)                | 0.062***<br>(0.011)  | 0.059***<br>(0.008)                                          | 0.074***<br>(0.010)  | 0.043***<br>(0.006)     | 0.026***<br>(0.009)  | 0.044***<br>(0.007)                | 0.026***<br>(0.009)  | 0.047***<br>(0.006)                                          | 0.031***<br>(0.009)  |
| Pregnant            | 0.037<br>(0.040)        | 0.031<br>(0.055)     | 0.065<br>(0.040)                   | 0.058<br>(0.061)     | 0.060<br>(0.041)                                             | 0.072<br>(0.060)     | 0.067<br>(0.042)        | 0.055<br>(0.053)     | 0.081*<br>(0.043)                  | 0.065<br>(0.060)     | 0.076*<br>(0.043)                                            | 0.083<br>(0.056)     | 0.048<br>(0.037)        | 0.089*<br>(0.053)    | 0.057<br>(0.041)                   | 0.094<br>(0.060)     | 0.052<br>(0.042)                                             | 0.082<br>(0.059)     |
| Recently lost job   | 0.003<br>(0.017)        | -0.030<br>(0.023)    | 0.006<br>(0.017)                   | -0.033<br>(0.024)    | 0.002<br>(0.017)                                             | -0.032<br>(0.023)    | -0.009<br>(0.014)       | -0.032<br>(0.023)    | -0.008<br>(0.015)                  | -0.037<br>(0.024)    | -0.007<br>(0.015)                                            | -0.035<br>(0.024)    | 0.010<br>(0.012)        | -0.036***<br>(0.013) | 0.010<br>(0.013)                   | -0.042***<br>(0.013) | 0.010<br>(0.013)                                             | -0.034**<br>(0.013)  |
| Obese               | 0.094***<br>(0.007)     | 0.083***<br>(0.012)  | 0.095***<br>(0.008)                | 0.085***<br>(0.013)  | 0.091***<br>(0.008)                                          | 0.078***<br>(0.013)  | 0.097***<br>(0.007)     | 0.070***<br>(0.012)  | 0.098***<br>(0.007)                | 0.069***<br>(0.013)  | 0.096***<br>(0.007)                                          | 0.066***<br>(0.013)  | 0.006<br>(0.005)        | 0.004<br>(0.008)     | 0.005<br>(0.006)                   | 0.003<br>(0.009)     | 0.004<br>(0.005)                                             | 0.001<br>(0.008)     |
| year5               | -0.112***<br>(0.040)    | -0.132***<br>(0.044) | -0.154**<br>(0.073)                | -0.150***<br>(0.046) | 0.052<br>(0.049)                                             | -0.078<br>(0.093)    | 0.064<br>(0.046)        | -0.103**<br>(0.049)  | 0.043<br>(0.085)                   | -0.124**<br>(0.050)  | 0.055<br>(0.067)                                             | -0.077<br>(0.104)    | -0.008<br>(0.012)       | -0.125***<br>(0.036) | -0.000<br>(0.028)                  | -0.132***<br>(0.035) | 0.065<br>(0.048)                                             | -0.045<br>(0.065)    |
| year6               | -0.091***<br>(0.032)    | -0.149***<br>(0.045) | -0.134**<br>(0.053)                | -0.166***<br>(0.046) | -0.042<br>(0.030)                                            | -0.079<br>(0.100)    | -0.025<br>(0.032)       | -0.085*<br>(0.049)   | -0.066<br>(0.061)                  | -0.101*<br>(0.051)   | -0.048<br>(0.056)                                            | -0.005<br>(0.117)    | -0.072***<br>(0.023)    | -0.107***<br>(0.035) | -0.069**<br>(0.033)                | -0.109***<br>(0.034) | -0.043<br>(0.037)                                            | 0.004<br>(0.068)     |
| year7               | -0.071**<br>(0.033)     | -0.190***<br>(0.044) | -0.114**<br>(0.053)                | -0.211***<br>(0.047) | -0.031<br>(0.028)                                            | -0.134<br>(0.101)    | 0.012<br>(0.032)        | -0.142***<br>(0.048) | -0.029<br>(0.060)                  | -0.161***<br>(0.051) | -0.016<br>(0.055)                                            | -0.050<br>(0.117)    | -0.048**<br>(0.021)     | -0.138***<br>(0.037) | -0.046<br>(0.032)                  | -0.147***<br>(0.035) | -0.027<br>(0.035)                                            | -0.002<br>(0.067)    |
| year8               | -0.071**<br>(0.032)     | -0.117**<br>(0.049)  | -0.120**<br>(0.052)                | -0.124**<br>(0.053)  | -0.019<br>(0.025)                                            | -0.096<br>(0.111)    | 0.016<br>(0.031)        | -0.056<br>(0.053)    | -0.030<br>(0.060)                  | -0.071<br>(0.057)    | 0.002<br>(0.054)                                             | 0.012<br>(0.126)     | -0.056***<br>(0.021)    | -0.027<br>(0.042)    | -0.055*<br>(0.032)                 | -0.025<br>(0.042)    | -0.038<br>(0.034)                                            | 0.069<br>(0.078)     |
| year9               | -0.055*<br>(0.031)      | -0.111**<br>(0.052)  | -0.108**<br>(0.050)                | -0.133**<br>(0.055)  | -0.005<br>(0.019)                                            | -0.247**<br>(0.116)  | 0.011<br>(0.028)        | -0.087<br>(0.055)    | -0.036<br>(0.057)                  | -0.105*<br>(0.059)   | 0.003<br>(0.052)                                             | -0.151<br>(0.162)    | -0.040**<br>(0.018)     | -0.064<br>(0.043)    | -0.043<br>(0.029)                  | -0.069<br>(0.043)    | -0.037<br>(0.031)                                            | -0.010<br>(0.095)    |
| country5            |                         |                      | 0.067<br>(0.065)                   |                      |                                                              |                      |                         | 0.055<br>(0.050)     |                                    |                      |                                                              |                      |                         | 0.055*<br>(0.029)    |                                    |                      |                                                              |                      |
| country7            | 0.200***<br>(0.024)     |                      | 0.284***<br>(0.063)                |                      |                                                              |                      | 0.201***<br>(0.029)     |                      | 0.267***<br>(0.048)                |                      |                                                              |                      | 0.125***<br>(0.021)     |                      | 0.178***<br>(0.029)                |                      |                                                              |                      |
| country8            | -0.024<br>(0.026)       |                      | 0.054<br>(0.064)                   |                      |                                                              |                      | -0.052*<br>(0.030)      |                      | 0.002<br>(0.047)                   |                      |                                                              |                      | 0.001<br>(0.019)        |                      | 0.057**<br>(0.027)                 |                      |                                                              |                      |
| country9            | 0.100***<br>(0.028)     |                      | 0.186***<br>(0.066)                |                      |                                                              |                      | 0.061<br>(0.038)        |                      | 0.124**<br>(0.054)                 |                      |                                                              |                      | 0.105***<br>(0.028)     |                      | 0.159***<br>(0.034)                |                      |                                                              |                      |
| country11           | 0.107***<br>(0.025)     |                      | 0.198***<br>(0.065)                |                      |                                                              |                      | 0.113***<br>(0.029)     |                      | 0.179***<br>(0.048)                |                      |                                                              |                      | 0.142***<br>(0.019)     |                      | 0.198***<br>(0.027)                |                      |                                                              |                      |
| country12           | 0.091***                |                      | 0.174***                           |                      |                                                              |                      | 0.082***                |                      | 0.147***                           |                      |                                                              |                      | 0.051***                |                      | 0.106***                           |                      |                                                              |                      |



Effect of trust in people on hypertension detection, treatment and control among ALL hypertensives

| VARIABLES           | Hypertension detection  |                      |                                    |                      |                                                              |                      | Hypertension treatment  |                      |                                    |                      |                                                              |                      | Hypertension control    |                      |                                    |                      |                                                              |                      |
|---------------------|-------------------------|----------------------|------------------------------------|----------------------|--------------------------------------------------------------|----------------------|-------------------------|----------------------|------------------------------------|----------------------|--------------------------------------------------------------|----------------------|-------------------------|----------------------|------------------------------------|----------------------|--------------------------------------------------------------|----------------------|
|                     | OLS+individual controls |                      | OLS+individual+ community controls |                      | OLS+individual+ community controls + community fixed effects |                      | OLS+individual controls |                      | OLS+individual+ community controls |                      | OLS+individual+ community controls + community fixed effects |                      | OLS+individual controls |                      | OLS+individual+ community controls |                      | OLS+individual+ community controls + community fixed effects |                      |
|                     | HIC & UMIC              | LMIC & LIC           | HIC & UMIC                         | LMIC & LIC           | HIC & UMIC                                                   | LMIC & LIC           | HIC & UMIC              | LMIC & LIC           | HIC & UMIC                         | LMIC & LIC           | HIC & UMIC                                                   | LMIC & LIC           | HIC & UMIC              | LMIC & LIC           | HIC & UMIC                         | LMIC & LIC           | HIC & UMIC                                                   | LMIC & LIC           |
| Trust in people     | 0.000<br>(0.008)        | 0.009<br>(0.009)     | 0.000<br>(0.008)                   | 0.007<br>(0.009)     | 0.004<br>(0.008)                                             | -0.002<br>(0.009)    | 0.003<br>(0.008)        | 0.003<br>(0.008)     | -0.000<br>(0.008)                  | 0.003<br>(0.009)     | 0.004<br>(0.007)                                             | -0.000<br>(0.008)    | 0.005<br>(0.006)        | 0.002<br>(0.005)     | 0.005<br>(0.006)                   | 0.002<br>(0.005)     | 0.003<br>(0.006)                                             | 0.001<br>(0.004)     |
| Female              | 0.086***<br>(0.008)     | 0.092***<br>(0.012)  | 0.085***<br>(0.008)                | 0.091***<br>(0.013)  | 0.085***<br>(0.008)                                          | 0.078***<br>(0.010)  | 0.083***<br>(0.008)     | 0.093***<br>(0.011)  | 0.083***<br>(0.008)                | 0.097***<br>(0.011)  | 0.083***<br>(0.008)                                          | 0.080***<br>(0.009)  | 0.072***<br>(0.006)     | 0.031***<br>(0.005)  | 0.072***<br>(0.006)                | 0.031***<br>(0.006)  | 0.072***<br>(0.006)                                          | 0.023***<br>(0.005)  |
| Age                 | 0.030***<br>(0.004)     | 0.030***<br>(0.003)  | 0.030***<br>(0.004)                | 0.033***<br>(0.003)  | 0.030***<br>(0.004)                                          | 0.031***<br>(0.003)  | 0.029***<br>(0.004)     | 0.026***<br>(0.003)  | 0.029***<br>(0.004)                | 0.028***<br>(0.003)  | 0.029***<br>(0.004)                                          | 0.027***<br>(0.003)  | 0.013***<br>(0.003)     | 0.008***<br>(0.002)  | 0.013***<br>(0.003)                | 0.009***<br>(0.002)  | 0.013***<br>(0.003)                                          | 0.007***<br>(0.002)  |
| Age squared         | -0.000***<br>(0.000)    | -0.000***<br>(0.000) | -0.000***<br>(0.000)               | -0.000***<br>(0.000) | -0.000***<br>(0.000)                                         | -0.000***<br>(0.000) | -0.000***<br>(0.000)    | -0.000***<br>(0.000) | -0.000***<br>(0.000)               | -0.000***<br>(0.000) | -0.000***<br>(0.000)                                         | -0.000***<br>(0.000) | -0.000***<br>(0.000)    | -0.000***<br>(0.000) | -0.000***<br>(0.000)               | -0.000***<br>(0.000) | -0.000***<br>(0.000)                                         | -0.000***<br>(0.000) |
| Urban               | 0.005<br>(0.011)        | 0.045**<br>(0.018)   | 0.013<br>(0.013)                   | 0.055**<br>(0.026)   | -0.082<br>(0.064)                                            | -0.783***<br>(0.029) | -0.002<br>(0.012)       | 0.056***<br>(0.018)  | -0.001<br>(0.014)                  | 0.074***<br>(0.026)  | -0.153***<br>(0.058)                                         | -0.816***<br>(0.030) | 0.011<br>(0.009)        | 0.029***<br>(0.011)  | 0.014<br>(0.010)                   | 0.032*<br>(0.017)    | -0.066<br>(0.094)                                            | -0.980***<br>(0.029) |
| Married             | 0.005<br>(0.007)        | 0.012<br>(0.010)     | 0.006<br>(0.007)                   | 0.013<br>(0.007)     | 0.000<br>(0.007)                                             | 0.018<br>(0.011)     | 0.017**<br>(0.008)      | 0.004<br>(0.010)     | 0.018**<br>(0.008)                 | 0.002<br>(0.010)     | 0.014*<br>(0.008)                                            | 0.007<br>(0.010)     | 0.003<br>(0.006)        | 0.004<br>(0.007)     | 0.001<br>(0.006)                   | 0.001<br>(0.007)     | -0.001<br>(0.006)                                            | 0.006<br>(0.007)     |
| Secondary education | -0.017*<br>(0.009)      | 0.023**<br>(0.010)   | -0.017*<br>(0.009)                 | 0.021**<br>(0.010)   | -0.014<br>(0.010)                                            | 0.017*<br>(0.009)    | 0.002<br>(0.009)        | 0.034***<br>(0.009)  | 0.005<br>(0.010)                   | 0.031***<br>(0.010)  | 0.009<br>(0.009)                                             | 0.021**<br>(0.009)   | 0.002<br>(0.007)        | 0.023***<br>(0.005)  | 0.001<br>(0.008)                   | 0.024***<br>(0.006)  | 0.002<br>(0.007)                                             | 0.014***<br>(0.005)  |
| Tertiary education  | -0.031***<br>(0.012)    | 0.053***<br>(0.016)  | -0.031**<br>(0.013)                | 0.053***<br>(0.016)  | -0.026**<br>(0.012)                                          | 0.042***<br>(0.014)  | -0.014<br>(0.012)       | 0.069***<br>(0.013)  | -0.010<br>(0.014)                  | 0.067***<br>(0.011)  | -0.007<br>(0.011)                                            | 0.052***<br>(0.011)  | 0.015<br>(0.010)        | 0.042***<br>(0.011)  | 0.017<br>(0.010)                   | 0.043***<br>(0.010)  | 0.019*<br>(0.010)                                            | 0.038***<br>(0.009)  |
| Wealth quintile 2   | 0.046<br>(0.031)        | 0.046***<br>(0.014)  | 0.061**<br>(0.028)                 | 0.042***<br>(0.016)  | 0.029<br>(0.028)                                             | 0.055***<br>(0.015)  | 0.030<br>(0.025)        | 0.049***<br>(0.012)  | 0.038<br>(0.025)                   | 0.043***<br>(0.013)  | 0.009<br>(0.024)                                             | 0.047***<br>(0.013)  | 0.014<br>(0.011)        | 0.014<br>(0.006)     | 0.013<br>(0.013)                   | 0.011*<br>(0.007)    | 0.008<br>(0.014)                                             | 0.012*<br>(0.006)    |
| Wealth quintile 3   | 0.080*<br>(0.041)       | 0.076***<br>(0.015)  | 0.098***<br>(0.037)                | 0.064***<br>(0.034)  | 0.060*<br>(0.034)                                            | 0.056***<br>(0.016)  | 0.078**<br>(0.032)      | 0.078***<br>(0.014)  | 0.088***<br>(0.033)                | 0.068***<br>(0.015)  | 0.049*<br>(0.029)                                            | 0.048***<br>(0.014)  | 0.032**<br>(0.015)      | 0.037***<br>(0.008)  | 0.031*<br>(0.017)                  | 0.030***<br>(0.008)  | 0.016<br>(0.016)                                             | 0.021***<br>(0.007)  |
| Wealth quintile 4   | 0.073*<br>(0.041)       | 0.110***<br>(0.017)  | 0.088**<br>(0.037)                 | 0.099***<br>(0.018)  | 0.058*<br>(0.033)                                            | 0.068***<br>(0.018)  | 0.066**<br>(0.031)      | 0.112***<br>(0.015)  | 0.074***<br>(0.031)                | 0.100***<br>(0.016)  | 0.038<br>(0.028)                                             | 0.058***<br>(0.017)  | 0.045***<br>(0.015)     | 0.055***<br>(0.010)  | 0.044***<br>(0.016)                | 0.047***<br>(0.010)  | 0.030*<br>(0.016)                                            | 0.028***<br>(0.008)  |
| Wealth quintile 5   | 0.065<br>(0.041)        | 0.118***<br>(0.020)  | 0.083**<br>(0.038)                 | 0.106***<br>(0.021)  | 0.059*<br>(0.034)                                            | 0.081***<br>(0.021)  | 0.060*<br>(0.031)       | 0.119***<br>(0.020)  | 0.069**<br>(0.031)                 | 0.106***<br>(0.021)  | 0.036<br>(0.028)                                             | 0.067***<br>(0.022)  | 0.036**<br>(0.015)      | 0.063***<br>(0.015)  | 0.034**<br>(0.016)                 | 0.053***<br>(0.015)  | 0.022<br>(0.017)                                             | 0.031**<br>(0.015)   |
| Tobacco user        | 0.008<br>(0.009)        | 0.020**<br>(0.009)   | 0.005<br>(0.009)                   | 0.022**<br>(0.010)   | 0.004<br>(0.009)                                             | 0.022**<br>(0.009)   | 0.003<br>(0.008)        | 0.018*<br>(0.010)    | 0.001<br>(0.008)                   | 0.025**<br>(0.010)   | 0.000<br>(0.008)                                             | 0.017*<br>(0.009)    | 0.017***<br>(0.005)     | 0.023***<br>(0.006)  | 0.018***<br>(0.006)                | 0.025***<br>(0.006)  | 0.017***<br>(0.006)                                          | 0.018***<br>(0.007)  |
| Alcohol user        | -0.041***<br>(0.010)    | 0.013<br>(0.010)     | -0.042***<br>(0.011)               | 0.013<br>(0.011)     | -0.033***<br>(0.012)                                         | 0.002<br>(0.010)     | -0.054***<br>(0.010)    | -0.005<br>(0.009)    | -0.054***<br>(0.010)               | -0.006<br>(0.010)    | -0.046***<br>(0.011)                                         | -0.012<br>(0.010)    | -0.032***<br>(0.006)    | -0.010<br>(0.007)    | -0.033***<br>(0.006)               | -0.010<br>(0.007)    | -0.028***<br>(0.006)                                         | -0.009<br>(0.006)    |
| Diabetes            | 0.273***<br>(0.014)     | 0.226***<br>(0.013)  | 0.265***<br>(0.014)                | 0.215***<br>(0.013)  | 0.261***<br>(0.015)                                          | 0.195***<br>(0.012)  | 0.279***<br>(0.013)     | 0.221***<br>(0.012)  | 0.275***<br>(0.014)                | 0.220***<br>(0.012)  | 0.272***<br>(0.014)                                          | 0.202***<br>(0.011)  | 0.092***<br>(0.010)     | 0.079***<br>(0.008)  | 0.080***<br>(0.010)                | 0.080***<br>(0.009)  | 0.077***<br>(0.010)                                          | 0.072***<br>(0.008)  |
| Depressed           | 0.070***<br>(0.007)     | 0.078***<br>(0.011)  | 0.075***<br>(0.007)                | 0.086***<br>(0.012)  | 0.076***<br>(0.008)                                          | 0.090***<br>(0.011)  | 0.052***<br>(0.008)     | 0.057***<br>(0.011)  | 0.055***<br>(0.008)                | 0.062***<br>(0.012)  | 0.059***<br>(0.008)                                          | 0.068***<br>(0.011)  | 0.043***<br>(0.006)     | 0.021**<br>(0.008)   | 0.044***<br>(0.007)                | 0.022**<br>(0.009)   | 0.047***<br>(0.006)                                          | 0.028***<br>(0.009)  |
| Pregnant            | 0.038<br>(0.040)        | -0.042<br>(0.043)    | 0.065<br>(0.041)                   | -0.030<br>(0.047)    | 0.060<br>(0.041)                                             | -0.019<br>(0.044)    | 0.062<br>(0.042)        | -0.033<br>(0.039)    | 0.081*<br>(0.043)                  | -0.033<br>(0.042)    | 0.076*<br>(0.043)                                            | -0.012<br>(0.041)    | 0.049<br>(0.037)        | 0.042<br>(0.029)     | 0.057<br>(0.041)                   | 0.048<br>(0.032)     | 0.052<br>(0.042)                                             | 0.047<br>(0.033)     |
| Recently lost job   | 0.003<br>(0.017)        | 0.020<br>(0.023)     | 0.007<br>(0.017)                   | 0.022<br>(0.024)     | 0.002<br>(0.017)                                             | 0.005<br>(0.025)     | -0.010<br>(0.014)       | -0.016<br>(0.022)    | -0.007<br>(0.015)                  | -0.012<br>(0.023)    | -0.007<br>(0.015)                                            | -0.026<br>(0.023)    | 0.010<br>(0.012)        | -0.015<br>(0.014)    | 0.010<br>(0.013)                   | -0.019<br>(0.016)    | 0.011<br>(0.013)                                             | -0.028<br>(0.018)    |
| Obese               | 0.094***<br>(0.007)     | 0.109***<br>(0.010)  | 0.095***<br>(0.008)                | 0.108***<br>(0.011)  | 0.092***<br>(0.008)                                          | 0.102***<br>(0.010)  | 0.097***<br>(0.007)     | 0.096***<br>(0.010)  | 0.099***<br>(0.011)                | 0.094***<br>(0.011)  | 0.097***<br>(0.007)                                          | 0.089***<br>(0.010)  | 0.007<br>(0.005)        | 0.009<br>(0.006)     | 0.006<br>(0.006)                   | 0.010<br>(0.006)     | 0.004<br>(0.005)                                             | 0.007<br>(0.006)     |
| year5               | -0.113***<br>(0.040)    | 0.234***<br>(0.051)  | -0.022<br>(0.052)                  | 0.128<br>(0.177)     | 0.052<br>(0.049)                                             | 0.102<br>(0.092)     | 0.062<br>(0.045)        | 0.185***<br>(0.052)  | 0.106***<br>(0.036)                | 0.093<br>(0.175)     | 0.054<br>(0.067)                                             | 0.219***<br>(0.043)  | -0.008<br>(0.012)       | 0.095***<br>(0.022)  | 0.069***<br>(0.025)                | -0.071<br>(0.211)    | 0.066<br>(0.048)                                             | -0.072<br>(0.062)    |
| year7               | -0.072**<br>(0.033)     | 0.218***<br>(0.048)  | 0.018<br>(0.013)                   | 0.127<br>(0.027)     | -0.031<br>(0.087)                                            | 0.019<br>(0.087)     | 0.010<br>(0.031)        | 0.158***<br>(0.049)  | 0.036***<br>(0.011)                | 0.088<br>(0.177)     | -0.018<br>(0.054)                                            | 0.145***<br>(0.030)  | -0.050**<br>(0.021)     | 0.081***<br>(0.021)  | 0.023*<br>(0.013)                  | -0.076<br>(0.213)    | -0.027<br>(0.035)                                            | -0.079*<br>(0.046)   |
| year8               | -0.073**<br>(0.031)     | 0.274***<br>(0.053)  | 0.012<br>(0.013)                   | 0.192<br>(0.179)     | -0.020<br>(0.024)                                            | 0.077<br>(0.082)     | 0.014<br>(0.030)        | 0.200***<br>(0.053)  | 0.034***<br>(0.011)                | 0.140<br>(0.177)     | -0.000<br>(0.053)                                            | 0.202***<br>(0.033)  | -0.058***<br>(0.020)    | 0.154***<br>(0.026)  | 0.014<br>(0.013)                   | 0.003<br>(0.213)     | -0.038<br>(0.034)                                            | -0.010<br>(0.045)    |
| year9               | -0.056*<br>(0.030)      | 0.254***<br>(0.050)  | 0.025<br>(0.017)                   | 0.164<br>(0.180)     | -0.005<br>(0.019)                                            | 0.015<br>(0.079)     | 0.009<br>(0.027)        | 0.165***<br>(0.051)  | 0.028**<br>(0.014)                 | 0.098<br>(0.178)     | 0.002<br>(0.051)                                             | 0.157***<br>(0.038)  | -0.042**<br>(0.018)     | 0.109***<br>(0.025)  | 0.026*<br>(0.016)                  | -0.044<br>(0.214)    | -0.038<br>(0.031)                                            | -0.041<br>(0.038)    |
| year10              | 0.329***<br>(0.051)     | 0.133**<br>(0.053)   | 0.273<br>(0.186)                   | 0.022<br>(0.030)     | 0.022<br>(0.030)                                             | 0.019<br>(0.030)     | 0.027<br>(0.055)        | 0.181***<br>(0.060)  | 0.065<br>(0.185)                   | 0.168<br>(0.185)     | 0.065<br>(0.008)                                             | 0.233***<br>(0.008)  | 0.137***<br>(0.026)     | 0.071**<br>(0.034)   | 0.009<br>(0.217)                   | 0.009<br>(0.021)     | 0.019<br>(0.022)                                             |                      |
| country3            | -0.126*<br>(0.066)      |                      | -0.060<br>(0.066)                  |                      |                                                              |                      | -0.185**<br>(0.074)     | -0.051<br>(0.051)    |                                    |                      |                                                              |                      | -0.114***<br>(0.021)    | -0.058**<br>(0.029)  |                                    |                      |                                                              |                      |
| country7            | 0.144***<br>(0.054)     |                      | 0.222***<br>(0.028)                |                      |                                                              |                      | 0.070<br>(0.063)        | 0.215***<br>(0.031)  |                                    |                      |                                                              |                      | 0.071**<br>(0.028)      | 0.122***<br>(0.025)  |                                    |                      |                                                              |                      |
| country8            | -0.079<br>(0.054)       |                      | -0.008<br>(0.028)                  |                      |                                                              |                      | -0.183***<br>(0.064)    | -0.049*<br>(0.030)   |                                    |                      |                                                              |                      | -0.053*<br>(0.027)      | 0.002<br>(0.024)     |                                    |                      |                                                              |                      |
| country9            | 0.044<br>(0.057)        |                      | 0.123***<br>(0.030)                |                      |                                                              |                      | -0.071<br>(0.068)       | 0.071*<br>(0.039)    |                                    |                      |                                                              |                      | 0.053<br>(0.035)        | 0.106***<br>(0.030)  |                                    |                      |                                                              |                      |
| country11           | 0.051<br>(0.055)        |                      | 0.135***<br>(0.029)                |                      |                                                              |                      | -0.018<br>(0.063)       | 0.127***<br>(0.031)  |                                    |                      |                                                              |                      | 0.089***<br>(0.027)     | 0.143***<br>(0.025)  |                                    |                      |                                                              |                      |
| country12           | 0.032                   |                      | 0.109***                           |                      |                                                              |                      | -0.050                  | 0.093***             |                                    |                      |                                                              |                      | -0.001                  | 0.053**              |                                    |                      |                                                              |                      |

|                                           |           |           |           |           |           |           |          |           |           |           |           |           |           |           |           |           |           |         |         |          |
|-------------------------------------------|-----------|-----------|-----------|-----------|-----------|-----------|----------|-----------|-----------|-----------|-----------|-----------|-----------|-----------|-----------|-----------|-----------|---------|---------|----------|
|                                           | (0.055)   |           | (0.028)   |           |           |           | (0.064)  |           | (0.030)   |           |           | (0.028)   |           | (0.023)   |           |           |           |         |         |          |
| country13                                 | 0.044     |           | 0.118***  |           |           |           | -0.042   |           | 0.096**   |           |           | -0.047    |           | 0.005     |           |           |           |         |         |          |
|                                           | (0.064)   |           | (0.039)   |           |           |           | (0.071)  |           | (0.043)   |           |           | (0.034)   |           | (0.031)   |           |           |           |         |         |          |
| country14                                 | -0.039    |           | 0.047     |           |           |           | -0.163** |           | -0.017    |           |           | -0.044*   |           | 0.014     |           |           |           |         |         |          |
|                                           | (0.054)   |           | (0.030)   |           |           |           | (0.064)  |           | (0.035)   |           |           | (0.026)   |           | (0.029)   |           |           |           |         |         |          |
| country16                                 | -0.024    |           | 0.052     |           |           |           | -0.135** |           | 0.006     |           |           | 0.012     |           | 0.070**   |           |           |           |         |         |          |
|                                           | (0.056)   |           | (0.033)   |           |           |           | (0.065)  |           | (0.036)   |           |           | (0.031)   |           | (0.029)   |           |           |           |         |         |          |
| Public health facility available          |           |           | 0.064**   | 0.041     |           |           |          |           | 0.078*    | 0.062**   |           |           |           | 0.033**   | 0.027     |           |           |         |         |          |
|                                           |           |           | (0.028)   | (0.026)   |           |           |          |           | (0.043)   | (0.025)   |           |           |           | (0.013)   | (0.018)   |           |           |         |         |          |
| Private health facility available         |           |           | 0.010     | 0.007     |           |           |          |           | 0.012     | -0.019    |           |           |           | -0.007    | 0.001     |           |           |         |         |          |
|                                           |           |           | (0.014)   | (0.026)   |           |           |          |           | (0.014)   | (0.025)   |           |           |           | (0.013)   | (0.013)   |           |           |         |         |          |
| Any antihypertensive drug available       |           |           | -0.013    | -0.069*   |           |           |          |           | -0.019    | -0.094**  |           |           |           | -0.003    | -0.044    |           |           |         |         |          |
|                                           |           |           | (0.037)   | (0.039)   |           |           |          |           | (0.039)   | (0.040)   |           |           |           | (0.030)   | (0.028)   |           |           |         |         |          |
| Number of antihypertensive drug available |           |           | -0.002    | 0.010*    |           |           |          |           | -0.001    | 0.010*    |           |           |           | 0.001     | 0.006     |           |           |         |         |          |
|                                           |           |           | (0.004)   | (0.006)   |           |           |          |           | (0.004)   | (0.006)   |           |           |           | (0.004)   | (0.004)   |           |           |         |         |          |
| Electric street lighting present          |           |           | 0.041*    | 0.035     |           |           |          |           | 0.043     | 0.035     |           |           |           | 0.019     | 0.018     |           |           |         |         |          |
|                                           |           |           | (0.024)   | (0.024)   |           |           |          |           | (0.028)   | (0.022)   |           |           |           | (0.020)   | (0.015)   |           |           |         |         |          |
| Traffic lights present                    |           |           | -0.022    | -0.020    |           |           |          |           | -0.014    | -0.016    |           |           |           | 0.002     | -0.007    |           |           |         |         |          |
|                                           |           |           | (0.013)   | (0.026)   |           |           |          |           | (0.016)   | (0.028)   |           |           |           | (0.011)   | (0.020)   |           |           |         |         |          |
| Completeness of road paving               |           |           | -0.014    | -0.018    |           |           |          |           | -0.006    | -0.003    |           |           |           | -0.009    | -0.009    |           |           |         |         |          |
|                                           |           |           | (0.019)   | (0.016)   |           |           |          |           | (0.019)   | (0.016)   |           |           |           | (0.015)   | (0.012)   |           |           |         |         |          |
| year6                                     | -0.091*** | 0.224***  |           | 0.123     | -0.041    | 0.059     |          | -0.026    | 0.178***  |           | 0.096     | -0.048    | 0.188***  |           | -0.074*** | 0.092***  | -0.072    | -0.043  | -0.063  |          |
|                                           | (0.032)   | (0.047)   |           | (0.177)   | (0.029)   | (0.087)   |          | (0.031)   | (0.048)   |           | (0.175)   | (0.055)   | (0.025)   |           | (0.023)   | (0.018)   | (0.212)   | (0.037) | (0.046) |          |
| year12                                    |           | 0.038     |           |           |           |           |          | 0.002     |           |           |           |           |           | 0.147**   |           |           |           |         |         |          |
|                                           |           | (0.082)   |           |           |           |           |          | (0.090)   |           |           |           |           |           | (0.068)   |           |           |           |         |         |          |
| year13                                    |           | -0.020    | -0.050    |           |           |           |          | -0.010    | -0.060**  |           |           |           |           | 0.097***  | -0.031*   |           |           |         |         |          |
|                                           |           | (0.054)   | (0.055)   |           |           |           |          | (0.060)   | (0.025)   |           |           |           |           | (0.031)   | (0.018)   |           |           |         |         |          |
| country5                                  |           | -0.061    |           |           |           |           |          | -0.136**  |           |           |           |           |           | -0.053*   |           |           |           |         |         |          |
|                                           |           | (0.057)   |           |           |           |           |          | (0.068)   |           |           |           |           |           | (0.030)   |           |           |           |         |         |          |
| year4                                     |           | 0.115     |           |           | 0.078     |           |          | 0.087     |           |           |           |           | 0.224*    |           | 0.170     |           |           |         | 0.068   |          |
|                                           |           | (0.188)   |           |           | (0.150)   |           |          | (0.185)   |           |           |           |           | (0.126)   |           | (0.217)   |           |           |         | (0.189) |          |
| year11                                    |           | 0.312***  |           | 0.260     |           |           |          | 0.169***  |           | 0.158     |           |           |           | 0.122***  |           | -0.004    |           |         |         |          |
|                                           |           | (0.053)   |           | (0.188)   |           |           |          | (0.053)   |           | (0.185)   |           |           |           | (0.033)   |           | (0.218)   |           |         |         |          |
| year14                                    |           | 0.116**   |           |           |           |           |          | 0.118***  |           |           |           |           |           | -0.155*** |           |           |           |         |         |          |
|                                           |           | (0.053)   |           |           |           |           |          | (0.026)   |           |           |           |           |           | (0.019)   |           |           |           |         |         |          |
| country2                                  |           | 0.010     |           | 0.047     |           |           |          | -0.013    |           | 0.018     |           |           |           | -0.056*** |           | -0.033    |           |         |         |          |
|                                           |           | (0.028)   |           | (0.034)   |           |           |          | (0.026)   |           | (0.032)   |           |           |           | (0.017)   |           | (0.025)   |           |         |         |          |
| country4                                  |           | 0.067**   |           | 0.058*    |           |           |          | 0.090***  |           | 0.070**   |           |           |           | 0.025     |           | 0.020     |           |         |         |          |
|                                           |           | (0.033)   |           | (0.034)   |           |           |          | (0.031)   |           | (0.032)   |           |           |           | (0.022)   |           | (0.023)   |           |         |         |          |
| country6                                  |           | 0.094**   |           | 0.120***  |           |           |          | -0.066**  |           | -0.036    |           |           |           | -0.022    |           | -0.005    |           |         |         |          |
|                                           |           | (0.040)   |           | (0.034)   |           |           |          | (0.026)   |           | (0.037)   |           |           |           | (0.017)   |           | (0.026)   |           |         |         |          |
| country10                                 |           | 0.024     |           | 0.014     |           |           |          | 0.084***  |           | 0.068**   |           |           |           | 0.002     |           | -0.006    |           |         |         |          |
|                                           |           | (0.035)   |           | (0.036)   |           |           |          | (0.032)   |           | (0.033)   |           |           |           | (0.026)   |           | (0.027)   |           |         |         |          |
| country15                                 |           | -0.056    |           |           |           |           |          | -0.072*   |           |           |           |           |           | -0.107*** |           |           |           |         |         |          |
|                                           |           | (0.042)   |           |           |           |           |          | (0.039)   |           |           |           |           |           | (0.026)   |           |           |           |         |         |          |
| country17                                 |           | -0.012    |           | -0.005    |           |           |          | 0.002     |           | 0.013     |           |           |           | -0.008    |           | -0.003    |           |         |         |          |
|                                           |           | (0.031)   |           | (0.036)   |           |           |          | (0.033)   |           | (0.038)   |           |           |           | (0.025)   |           | (0.028)   |           |         |         |          |
| country18                                 |           | 0.017     |           |           |           |           |          | -0.036    |           |           |           |           |           | 0.032     |           |           |           |         |         |          |
|                                           |           | (0.055)   |           |           |           |           |          | (0.046)   |           |           |           |           |           | (0.021)   |           |           |           |         |         |          |
| country21                                 |           | 0.393***  |           |           |           |           |          | 0.310***  |           |           |           |           |           | 0.193***  |           |           |           |         |         |          |
|                                           |           | (0.068)   |           |           |           |           |          | (0.050)   |           |           |           |           |           | (0.024)   |           |           |           |         |         |          |
| year3                                     |           |           |           | -0.133    |           |           |          |           |           | -0.109    |           |           |           |           |           |           |           |         | -0.177  |          |
|                                           |           |           |           | (0.191)   |           |           |          |           |           | (0.188)   |           |           |           |           |           |           |           |         | (0.220) |          |
| Constant                                  | -0.677*** | -1.087*** | -0.913*** | -1.074*** | -0.648*** | -0.403*** |          | -0.757*** | -0.980*** | -0.997*** | -0.980*** | -0.686*** | -0.441*** |           | -0.300*** | -0.321*** | -0.435*** | -0.183  | -0.234* | 0.439*** |
|                                           | (0.123)   | (0.086)   | (0.116)   | (0.214)   | (0.132)   | (0.130)   |          | (0.118)   | (0.083)   | (0.124)   | (0.212)   | (0.133)   | (0.095)   |           | (0.083)   | (0.056)   | (0.089)   | (0.232) | (0.129) | (0.081)  |
| Observations                              | 23,884    | 26,949    | 22,372    | 23,784    | 22,372    | 23,784    |          | 23,884    | 26,949    | 22,372    | 23,784    | 22,372    | 23,784    |           | 23,884    | 26,949    | 22,372    | 23,784  | 22,372  | 23,784   |
| R-squared                                 | 0.141     | 0.103     | 0.138     | 0.099     | 0.103     | 0.058     |          | 0.158     | 0.121     | 0.157     | 0.117     | 0.123     | 0.062     |           | 0.058     | 0.053     | 0.054     | 0.052   | 0.026   | 0.012    |
| Number of epochid                         |           |           |           |           | 211       | 204       |          |           |           |           |           |           |           |           |           |           |           |         | 211     | 204      |

Robust standard errors in parentheses  
\*\*\* p<0.01, \*\* p<0.05, \* p<0.1

Effect of trust in organisations on hypertension detection, treatment and control among ALL hypertensives

| VARIABLES              | Hypertension detection  |                      |                                    |                      |                                                              |                      | Hypertension treatment  |                      |                                    |                      |                                                              |                      | Hypertension control    |                      |                                    |                      |                                                              |                      |
|------------------------|-------------------------|----------------------|------------------------------------|----------------------|--------------------------------------------------------------|----------------------|-------------------------|----------------------|------------------------------------|----------------------|--------------------------------------------------------------|----------------------|-------------------------|----------------------|------------------------------------|----------------------|--------------------------------------------------------------|----------------------|
|                        | OLS+individual controls |                      | OLS+individual+ community controls |                      | OLS+individual+ community controls + community fixed effects |                      | OLS+individual controls |                      | OLS+individual+ community controls |                      | OLS+individual+ community controls + community fixed effects |                      | OLS+individual controls |                      | OLS+individual+ community controls |                      | OLS+individual+ community controls + community fixed effects |                      |
|                        | HIC & UMIC              | LMIC & LIC           | HIC & UMIC                         | LMIC & LIC           | HIC & UMIC                                                   | LMIC & LIC           | HIC & UMIC              | LMIC & LIC           | HIC & UMIC                         | LMIC & LIC           | HIC & UMIC                                                   | LMIC & LIC           | HIC & UMIC              | LMIC & LIC           | HIC & UMIC                         | LMIC & LIC           | HIC & UMIC                                                   | LMIC & LIC           |
| Trust in organisations | 0.007<br>(0.009)        | 0.054**<br>(0.021)   | 0.009<br>(0.010)                   | 0.063***<br>(0.023)  | 0.011<br>(0.010)                                             | 0.039*<br>(0.023)    | -0.007<br>(0.009)       | 0.027<br>(0.023)     | -0.007<br>(0.010)                  | 0.035<br>(0.025)     | -0.002<br>(0.010)                                            | 0.000<br>(0.024)     | 0.002<br>(0.007)        | 0.022<br>(0.017)     | 0.004<br>(0.007)                   | 0.018<br>(0.018)     | 0.008<br>(0.007)                                             | 0.011<br>(0.018)     |
| Female                 | 0.084***<br>(0.008)     | 0.093***<br>(0.012)  | 0.084***<br>(0.008)                | 0.091***<br>(0.013)  | 0.084***<br>(0.008)                                          | 0.078***<br>(0.010)  | 0.082***<br>(0.008)     | 0.094***<br>(0.011)  | 0.082***<br>(0.008)                | 0.096***<br>(0.011)  | 0.082***<br>(0.008)                                          | 0.079***<br>(0.009)  | 0.072***<br>(0.006)     | 0.031***<br>(0.006)  | 0.072***<br>(0.006)                | 0.031***<br>(0.006)  | 0.072***<br>(0.006)                                          | 0.023***<br>(0.005)  |
| Age                    | 0.030***<br>(0.004)     | 0.031***<br>(0.003)  | 0.031***<br>(0.004)                | 0.033***<br>(0.003)  | 0.030***<br>(0.004)                                          | 0.031***<br>(0.003)  | 0.030***<br>(0.004)     | 0.026***<br>(0.003)  | 0.029***<br>(0.004)                | 0.028***<br>(0.003)  | 0.029***<br>(0.004)                                          | 0.027***<br>(0.003)  | 0.013***<br>(0.003)     | 0.009***<br>(0.002)  | 0.013***<br>(0.003)                | 0.009***<br>(0.002)  | 0.013***<br>(0.003)                                          | 0.007***<br>(0.002)  |
| Age squared            | -0.000***<br>(0.000)    | -0.000***<br>(0.000) | -0.000***<br>(0.000)               | -0.000***<br>(0.000) | -0.000***<br>(0.000)                                         | -0.000***<br>(0.000) | -0.000***<br>(0.000)    | -0.000***<br>(0.000) | -0.000***<br>(0.000)               | -0.000***<br>(0.000) | -0.000***<br>(0.000)                                         | -0.000***<br>(0.000) | -0.000***<br>(0.000)    | -0.000***<br>(0.000) | -0.000***<br>(0.000)               | -0.000***<br>(0.000) | -0.000***<br>(0.000)                                         | -0.000***<br>(0.000) |
| Urban                  | 0.005<br>(0.011)        | 0.044**<br>(0.018)   | 0.013<br>(0.013)                   | 0.055**<br>(0.026)   | -0.083<br>(0.064)                                            | -0.788***<br>(0.029) | -0.003<br>(0.012)       | 0.056***<br>(0.018)  | -0.003<br>(0.014)                  | 0.074***<br>(0.026)  | -0.154***<br>(0.059)                                         | -0.820***<br>(0.030) | 0.011<br>(0.009)        | 0.029***<br>(0.011)  | 0.015<br>(0.011)                   | 0.032*<br>(0.017)    | -0.068<br>(0.094)                                            | -0.980***<br>(0.029) |
| Married                | 0.005<br>(0.007)        | 0.011<br>(0.010)     | 0.006<br>(0.008)                   | 0.011<br>(0.011)     | 0.001<br>(0.007)                                             | 0.017<br>(0.011)     | 0.016**<br>(0.008)      | 0.002<br>(0.010)     | 0.017**<br>(0.008)                 | 0.000<br>(0.010)     | 0.014*<br>(0.008)                                            | 0.005<br>(0.010)     | 0.003<br>(0.006)        | 0.004<br>(0.007)     | 0.000<br>(0.006)                   | 0.001<br>(0.007)     | -0.001<br>(0.006)                                            | 0.006<br>(0.007)     |
| Secondary education    | -0.018**<br>(0.009)     | 0.023**<br>(0.010)   | -0.018*<br>(0.009)                 | 0.020**<br>(0.010)   | -0.015<br>(0.010)                                            | 0.017*<br>(0.009)    | 0.002<br>(0.009)        | 0.034***<br>(0.009)  | 0.005<br>(0.010)                   | 0.031***<br>(0.010)  | 0.008<br>(0.009)                                             | 0.021**<br>(0.008)   | 0.003<br>(0.007)        | 0.024***<br>(0.005)  | 0.001<br>(0.008)                   | 0.025***<br>(0.006)  | 0.003<br>(0.008)                                             | 0.015***<br>(0.005)  |
| Tertiary education     | -0.033***<br>(0.012)    | 0.053***<br>(0.016)  | -0.032**<br>(0.013)                | 0.052***<br>(0.016)  | -0.028**<br>(0.013)                                          | 0.041***<br>(0.014)  | -0.014<br>(0.012)       | 0.070***<br>(0.013)  | -0.009<br>(0.014)                  | 0.067***<br>(0.011)  | -0.007<br>(0.011)                                            | 0.052***<br>(0.011)  | 0.016<br>(0.010)        | 0.043***<br>(0.011)  | 0.017<br>(0.010)                   | 0.044***<br>(0.010)  | 0.020*<br>(0.011)                                            | 0.039***<br>(0.009)  |
| Wealth quintile 2      | 0.045<br>(0.032)        | 0.045***<br>(0.014)  | 0.062**<br>(0.029)                 | 0.041***<br>(0.016)  | 0.032<br>(0.029)                                             | 0.054***<br>(0.015)  | 0.031<br>(0.025)        | 0.049***<br>(0.012)  | 0.039<br>(0.026)                   | 0.042***<br>(0.013)  | 0.013<br>(0.025)                                             | 0.046***<br>(0.013)  | 0.017<br>(0.011)        | 0.014**<br>(0.006)   | 0.017<br>(0.014)                   | 0.011*<br>(0.007)    | 0.013<br>(0.014)                                             | 0.011*<br>(0.006)    |
| Wealth quintile 3      | 0.077*<br>(0.042)       | 0.077***<br>(0.016)  | 0.096**<br>(0.039)                 | 0.063***<br>(0.034)  | 0.059*<br>(0.034)                                            | 0.056***<br>(0.016)  | 0.077**<br>(0.033)      | 0.078***<br>(0.014)  | 0.088**<br>(0.034)                 | 0.068***<br>(0.015)  | 0.052*<br>(0.030)                                            | 0.048***<br>(0.014)  | 0.034**<br>(0.015)      | 0.038***<br>(0.008)  | 0.033*<br>(0.017)                  | 0.031***<br>(0.009)  | 0.020<br>(0.017)                                             | 0.021***<br>(0.007)  |
| Wealth quintile 4      | 0.071*<br>(0.042)       | 0.109***<br>(0.017)  | 0.087**<br>(0.039)                 | 0.098***<br>(0.018)  | 0.057*<br>(0.034)                                            | 0.068***<br>(0.018)  | 0.066**<br>(0.032)      | 0.111***<br>(0.015)  | 0.075***<br>(0.033)                | 0.100***<br>(0.016)  | 0.041<br>(0.029)                                             | 0.057***<br>(0.017)  | 0.047***<br>(0.015)     | 0.055***<br>(0.010)  | 0.047***<br>(0.017)                | 0.047***<br>(0.010)  | 0.034**<br>(0.016)                                           | 0.028***<br>(0.008)  |
| Wealth quintile 5      | 0.061<br>(0.042)        | 0.114***<br>(0.020)  | 0.080**<br>(0.039)                 | 0.102***<br>(0.021)  | 0.057*<br>(0.034)                                            | 0.078***<br>(0.021)  | 0.058*<br>(0.032)       | 0.116***<br>(0.019)  | 0.068**<br>(0.033)                 | 0.102***<br>(0.021)  | 0.038<br>(0.030)                                             | 0.064***<br>(0.022)  | 0.037**<br>(0.016)      | 0.061***<br>(0.015)  | 0.036**<br>(0.017)                 | 0.052***<br>(0.015)  | 0.024<br>(0.017)                                             | 0.030**<br>(0.015)   |
| Tobacco user           | 0.007<br>(0.009)        | 0.020**<br>(0.010)   | 0.005<br>(0.009)                   | 0.022**<br>(0.010)   | 0.004<br>(0.009)                                             | 0.021**<br>(0.009)   | 0.002<br>(0.008)        | 0.018*<br>(0.010)    | 0.000<br>(0.008)                   | 0.024**<br>(0.010)   | -0.001<br>(0.008)                                            | 0.016*<br>(0.009)    | 0.016**<br>(0.005)      | 0.024***<br>(0.006)  | 0.018***<br>(0.006)                | 0.025***<br>(0.006)  | 0.017***<br>(0.006)                                          | 0.018***<br>(0.007)  |
| Alcohol user           | -0.041***<br>(0.010)    | 0.015<br>(0.010)     | -0.042***<br>(0.011)               | 0.014<br>(0.011)     | -0.032***<br>(0.012)                                         | 0.002<br>(0.010)     | -0.054***<br>(0.009)    | -0.003<br>(0.009)    | -0.055***<br>(0.010)               | -0.006<br>(0.010)    | -0.046***<br>(0.011)                                         | -0.012<br>(0.010)    | -0.033***<br>(0.006)    | -0.010<br>(0.007)    | -0.033***<br>(0.006)               | -0.010<br>(0.007)    | -0.028***<br>(0.006)                                         | -0.010<br>(0.006)    |
| Diabetes               | 0.272***<br>(0.014)     | 0.226***<br>(0.013)  | 0.265***<br>(0.015)                | 0.215***<br>(0.013)  | 0.260***<br>(0.015)                                          | 0.195***<br>(0.012)  | 0.279***<br>(0.014)     | 0.222***<br>(0.012)  | 0.275***<br>(0.015)                | 0.221***<br>(0.012)  | 0.271***<br>(0.014)                                          | 0.202***<br>(0.011)  | 0.091***<br>(0.010)     | 0.080***<br>(0.008)  | 0.079***<br>(0.010)                | 0.080***<br>(0.009)  | 0.075***<br>(0.010)                                          | 0.073***<br>(0.008)  |
| Depressed              | 0.071***<br>(0.008)     | 0.075***<br>(0.011)  | 0.076***<br>(0.008)                | 0.084***<br>(0.012)  | 0.077***<br>(0.008)                                          | 0.088***<br>(0.011)  | 0.054***<br>(0.008)     | 0.055***<br>(0.011)  | 0.056***<br>(0.008)                | 0.061***<br>(0.012)  | 0.060***<br>(0.008)                                          | 0.067***<br>(0.011)  | 0.044***<br>(0.006)     | 0.020**<br>(0.008)   | 0.045***<br>(0.007)                | 0.022**<br>(0.009)   | 0.048***<br>(0.006)                                          | 0.028***<br>(0.009)  |
| Pregnant               | 0.034<br>(0.041)        | -0.045<br>(0.044)    | 0.063<br>(0.041)                   | -0.035<br>(0.048)    | 0.059<br>(0.042)                                             | -0.022<br>(0.044)    | 0.072*<br>(0.042)       | -0.030<br>(0.039)    | 0.087**<br>(0.043)                 | -0.028<br>(0.042)    | 0.082*<br>(0.044)                                            | -0.007<br>(0.041)    | 0.052<br>(0.038)        | 0.044<br>(0.029)     | 0.062<br>(0.042)                   | 0.050<br>(0.032)     | 0.056<br>(0.043)                                             | 0.048<br>(0.033)     |
| Recently lost job      | 0.001<br>(0.017)        | 0.020<br>(0.023)     | 0.004<br>(0.017)                   | 0.020<br>(0.024)     | -0.000<br>(0.017)                                            | 0.005<br>(0.024)     | -0.010<br>(0.014)       | -0.019<br>(0.022)    | -0.008<br>(0.014)                  | -0.015<br>(0.023)    | -0.008<br>(0.015)                                            | -0.028<br>(0.023)    | 0.009<br>(0.012)        | -0.017<br>(0.014)    | 0.009<br>(0.013)                   | -0.022<br>(0.015)    | 0.010<br>(0.013)                                             | -0.030<br>(0.018)    |
| Obese                  | 0.094***<br>(0.007)     | 0.110***<br>(0.010)  | 0.095***<br>(0.008)                | 0.108***<br>(0.011)  | 0.092***<br>(0.008)                                          | 0.102***<br>(0.010)  | 0.097***<br>(0.007)     | 0.096***<br>(0.010)  | 0.099***<br>(0.007)                | 0.094***<br>(0.011)  | 0.096***<br>(0.007)                                          | 0.089***<br>(0.010)  | 0.007<br>(0.005)        | 0.011*<br>(0.006)    | 0.005<br>(0.006)                   | 0.011*<br>(0.006)    | 0.004<br>(0.006)                                             | 0.008<br>(0.006)     |
| year5                  | -0.217**<br>(0.088)     | 0.007<br>(476.914)   | -0.024<br>(0.051)                  | 0.261***<br>(0.046)  | 0.057<br>(0.056)                                             | 0.103<br>(0.092)     | -0.078<br>(0.083)       | 0.031<br>(.)         | 0.107***<br>(0.034)                | 0.203***<br>(0.048)  | 0.051<br>(0.070)                                             | 0.221***<br>(0.043)  | -0.212***<br>(0.070)    | 0.028<br>(.)         | 0.067***<br>(0.026)                | 0.106***<br>(0.024)  | 0.071<br>(0.052)                                             | -0.072<br>(0.062)    |
| year7                  | -0.171**<br>(0.073)     | -0.010<br>(552.791)  | 0.021<br>(0.013)                   | 0.260***<br>(0.044)  | -0.025<br>(0.040)                                            | 0.021<br>(0.086)     | -0.128*<br>(0.077)      | 0.002<br>(.)         | 0.037***<br>(0.011)                | 0.197***<br>(0.046)  | -0.022<br>(0.058)                                            | 0.148***<br>(0.031)  | -0.250***<br>(0.068)    | 0.013<br>(235.302)   | 0.024*<br>(0.013)                  | 0.101***<br>(0.024)  | -0.020<br>(0.040)                                            | -0.078*<br>(0.046)   |
| year8                  | -0.172**<br>(0.073)     | 0.048<br>(389.186)   | 0.014<br>(0.013)                   | 0.326***<br>(0.050)  | -0.014<br>(0.038)                                            | 0.080<br>(0.082)     | -0.124<br>(0.077)       | 0.046<br>(.)         | 0.035***<br>(0.011)                | 0.249***<br>(0.050)  | -0.005<br>(0.058)                                            | 0.204***<br>(0.033)  | -0.259***<br>(0.068)    | 0.086<br>(.)         | 0.015<br>(0.013)                   | 0.180***<br>(0.030)  | -0.032<br>(0.039)                                            | -0.010<br>(0.046)    |
| year9                  | -0.155**<br>(0.074)     | 0.026<br>(413.572)   | 0.028*<br>(0.016)                  | 0.297***<br>(0.047)  | 0.002<br>(0.034)                                             | 0.021<br>(0.078)     | -0.129*<br>(0.078)      | 0.011<br>(.)         | 0.029**<br>(0.014)                 | 0.208***<br>(0.049)  | -0.002<br>(0.056)                                            | 0.155***<br>(0.039)  | -0.242***<br>(0.069)    | 0.040<br>(193.515)   | 0.027*<br>(0.016)                  | 0.132***<br>(0.029)  | -0.030<br>(0.037)                                            | -0.042<br>(0.038)    |
| year10                 | -0.091<br>(0.079)       | 0.106<br>(.)         | 0.136**<br>(0.062)                 | 0.410***<br>(0.053)  | 0.025<br>(0.031)                                             | 0.025<br>(0.031)     | -0.128<br>(0.082)       | 0.030<br>(.)         | 0.070<br>(0.061)                   | 0.280***<br>(0.060)  | 0.025***<br>(0.008)                                          | 0.025***<br>(0.008)  | -0.198***<br>(0.071)    | 0.070<br>(.)         | 0.065*<br>(0.038)                  | 0.186***<br>(0.034)  | 0.019<br>(0.022)                                             |                      |
| country5               |                         |                      | 0.067<br>(0.066)                   |                      |                                                              |                      |                         | 0.050<br>(0.049)     |                                    |                      |                                                              |                      |                         |                      | 0.058*<br>(0.030)                  |                      |                                                              |                      |
| country7               | 0.204***<br>(0.024)     |                      | 0.289***<br>(0.063)                |                      |                                                              |                      | 0.206***<br>(0.030)     |                      | 0.267***<br>(0.046)                |                      |                                                              |                      | 0.124***<br>(0.020)     |                      | 0.181***<br>(0.029)                |                      |                                                              |                      |
| country8               | -0.019<br>(0.026)       |                      | 0.059<br>(0.064)                   |                      |                                                              |                      | -0.047<br>(0.030)       |                      | 0.002<br>(0.045)                   |                      |                                                              |                      | -0.000<br>(0.019)       |                      | 0.060**<br>(0.027)                 |                      |                                                              |                      |
| country9               | 0.103***<br>(0.029)     |                      | 0.188***<br>(0.065)                |                      |                                                              |                      | 0.066*<br>(0.039)       |                      | 0.123**<br>(0.052)                 |                      |                                                              |                      | 0.102***<br>(0.028)     |                      | 0.160***<br>(0.035)                |                      |                                                              |                      |
| country11              | 0.111***<br>(0.025)     |                      | 0.202***<br>(0.064)                |                      |                                                              |                      | 0.117***<br>(0.030)     |                      | 0.178***<br>(0.046)                |                      |                                                              |                      | 0.141***<br>(0.019)     |                      | 0.200***<br>(0.028)                |                      |                                                              |                      |
| country12              | 0.090***                |                      | 0.174***                           |                      |                                                              |                      | 0.083***                |                      | 0.142***                           |                      |                                                              |                      | 0.049**                 |                      | 0.109***                           |                      |                                                              |                      |

|                                           |           |           |           |           |           |           |           |          |           |           |           |           |          |         |           |           |         |          |
|-------------------------------------------|-----------|-----------|-----------|-----------|-----------|-----------|-----------|----------|-----------|-----------|-----------|-----------|----------|---------|-----------|-----------|---------|----------|
|                                           | (0.025)   | (0.062)   |           |           |           | (0.030)   | (0.044)   |          |           |           | (0.019)   | (0.026)   |          |         |           |           |         |          |
| country13                                 | 0.105**   | 0.186***  |           |           |           | 0.093**   | 0.148***  |          |           |           | 0.005     | 0.063*    |          |         |           |           |         |          |
|                                           | (0.043)   | (0.069)   |           |           |           | (0.046)   | (0.052)   |          |           |           | (0.027)   | (0.034)   |          |         |           |           |         |          |
| country14                                 | 0.019     | 0.112*    |           |           |           | -0.028    | 0.033     |          |           |           | 0.006     | 0.069***  |          |         |           |           |         |          |
|                                           | (0.025)   | (0.057)   |           |           |           | (0.030)   | (0.041)   |          |           |           | (0.020)   | (0.023)   |          |         |           |           |         |          |
| country16                                 | 0.034     | 0.117*    |           |           |           | 0.001     | 0.057     |          |           |           | 0.063**   | 0.127***  |          |         |           |           |         |          |
|                                           | (0.029)   | (0.064)   |           |           |           | (0.034)   | (0.044)   |          |           |           | (0.025)   | (0.030)   |          |         |           |           |         |          |
| Public health facility available          |           | 0.065**   | 0.041     |           |           |           | 0.077*    | 0.063**  |           |           |           | 0.033**   | 0.027    |         |           |           |         |          |
|                                           |           | (0.029)   | (0.026)   |           |           |           | (0.042)   | (0.025)  |           |           |           | (0.013)   | (0.018)  |         |           |           |         |          |
| Private health facility available         |           | 0.009     | 0.008     |           |           |           | 0.012     | -0.018   |           |           |           | -0.008    | 0.001    |         |           |           |         |          |
|                                           |           | (0.014)   | (0.026)   |           |           |           | (0.014)   | (0.025)  |           |           |           | (0.013)   | (0.013)  |         |           |           |         |          |
| Any antihypertensive drug available       |           | -0.017    | -0.067*   |           |           |           | -0.017    | -0.092** |           |           |           | -0.003    | -0.044   |         |           |           |         |          |
|                                           |           | (0.037)   | (0.039)   |           |           |           | (0.041)   | (0.040)  |           |           |           | (0.028)   | (0.027)  |         |           |           |         |          |
| Number of antihypertensive drug available |           | -0.002    | 0.010*    |           |           |           | -0.001    | 0.009*   |           |           |           | 0.001     | 0.006    |         |           |           |         |          |
|                                           |           | (0.004)   | (0.006)   |           |           |           | (0.004)   | (0.006)  |           |           |           | (0.004)   | (0.004)  |         |           |           |         |          |
| Electric street lighting present          |           | 0.041*    | 0.036     |           |           |           | 0.040     | 0.036    |           |           |           | 0.019     | 0.019    |         |           |           |         |          |
|                                           |           | (0.025)   | (0.024)   |           |           |           | (0.028)   | (0.022)  |           |           |           | (0.020)   | (0.015)  |         |           |           |         |          |
| Traffic lights present                    |           | -0.022    | -0.021    |           |           |           | -0.013    | -0.016   |           |           |           | 0.002     | -0.007   |         |           |           |         |          |
|                                           |           | (0.014)   | (0.026)   |           |           |           | (0.016)   | (0.028)  |           |           |           | (0.010)   | (0.020)  |         |           |           |         |          |
| Completeness of road paving               |           | -0.013    | -0.018    |           |           |           | -0.005    | -0.004   |           |           |           | -0.009    | -0.009   |         |           |           |         |          |
|                                           |           | (0.019)   | (0.016)   |           |           |           | (0.019)   | (0.016)  |           |           |           | (0.015)   | (0.012)  |         |           |           |         |          |
| year6                                     | -0.192*** | -0.003    | 0.256***  | -0.038    | 0.062     | -0.165**  | 0.023     | 0.205*** | -0.053    | 0.191***  | -0.276*** | 0.024     | 0.105*** | -0.037  | -0.062    |           |         |          |
|                                           | (0.074)   | (423.000) | (0.040)   | (0.041)   | (0.087)   | (0.077)   | (.)       | (0.043)  | (0.059)   | (0.026)   | (0.069)   | (.)       | (0.020)  | (0.042) | (0.046)   |           |         |          |
| year13                                    | -0.058    | -0.059    |           |           |           | -0.012    | -0.060**  |          |           |           | -0.052    | -0.038*   |          |         |           |           |         |          |
|                                           | (0.077)   | (0.055)   |           |           |           | (0.075)   | (0.025)   |          |           |           | (0.072)   | (0.020)   |          |         |           |           |         |          |
| year14                                    | -0.039    | 0.085     |           |           |           | -0.004    | 0.096***  |          |           |           | -0.149**  | -0.173*** |          |         |           |           |         |          |
|                                           | (0.082)   | (0.060)   |           |           |           | (0.090)   | (0.030)   |          |           |           | (0.068)   | (0.022)   |          |         |           |           |         |          |
| country3                                  | -0.072    |           |           |           |           | -0.050    |           |          |           |           | -0.061**  |           |          |         |           |           |         |          |
|                                           | (0.063)   |           |           |           |           | (0.048)   |           |          |           |           | (0.026)   |           |          |         |           |           |         |          |
| year3                                     |           | -0.228    |           |           |           |           | -0.154    |          |           |           |           | -0.067    |          |         |           |           |         |          |
|                                           |           | (154.838) |           |           |           |           | (.)       |          |           |           | (282.076) |           |          |         |           |           |         |          |
| year4                                     |           | -0.112    | 0.133     |           | 0.083     |           | -0.067    | 0.109    |           | 0.231*    |           | 0.102     | 0.177    |         | 0.069     |           |         |          |
|                                           |           | (768.727) | (0.190)   |           | (0.149)   |           | (.)       | (0.188)  |           | (0.125)   |           | (.)       | (0.220)  |         | (0.189)   |           |         |          |
| year11                                    |           | 0.086     | 0.394***  |           |           |           | 0.016     | 0.268*** |           |           |           | 0.054     | 0.172*** |         |           |           |         |          |
|                                           |           | (11.932)  | (0.054)   |           |           |           | (.)       | (0.057)  |           |           |           | (.)       | (0.037)  |         |           |           |         |          |
| country2                                  |           | 0.012     | 0.049     |           |           |           | -0.011    | 0.019    |           |           |           | -0.055*** | -0.033   |         |           |           |         |          |
|                                           |           | (0.028)   | (0.035)   |           |           |           | (0.027)   | (0.033)  |           |           |           | (0.017)   | (0.025)  |         |           |           |         |          |
| country4                                  |           | 0.061*    | 0.051     |           |           |           | 0.087***  | 0.066**  |           |           |           | 0.024     | 0.020    |         |           |           |         |          |
|                                           |           | (0.033)   | (0.034)   |           |           |           | (0.031)   | (0.033)  |           |           |           | (0.022)   | (0.024)  |         |           |           |         |          |
| country6                                  |           | 0.084**   | 0.109***  |           |           |           | -0.073*** | -0.044   |           |           |           | -0.025    | -0.008   |         |           |           |         |          |
|                                           |           | (0.041)   | (0.035)   |           |           |           | (0.027)   | (0.036)  |           |           |           | (0.017)   | (0.025)  |         |           |           |         |          |
| country10                                 |           | 0.026     | 0.014     |           |           |           | 0.085***  | 0.069**  |           |           |           | 0.003     | -0.005   |         |           |           |         |          |
|                                           |           | (0.035)   | (0.037)   |           |           |           | (0.032)   | (0.034)  |           |           |           | (0.026)   | (0.027)  |         |           |           |         |          |
| country15                                 |           | -0.050    |           |           |           |           | -0.069*   |          |           |           |           | -0.106*** |          |         |           |           |         |          |
|                                           |           | (0.043)   |           |           |           |           | (0.039)   |          |           |           |           | (0.026)   |          |         |           |           |         |          |
| country17                                 |           | -0.012    | -0.005    |           |           |           | 0.002     | 0.012    |           |           |           | -0.007    | -0.002   |         |           |           |         |          |
|                                           |           | (0.031)   | (0.036)   |           |           |           | (0.033)   | (0.038)  |           |           |           | (0.025)   | (0.028)  |         |           |           |         |          |
| country18                                 |           | -0.200    |           |           |           |           | -0.188    |          |           |           |           | -0.029    |          |         |           |           |         |          |
|                                           |           | (517.628) |           |           |           |           | (.)       |          |           |           |           | (.)       |          |         |           |           |         |          |
| country21                                 |           | 0.166     |           |           |           |           | 0.144     |          |           |           |           | 0.127     |          |         |           |           |         |          |
|                                           |           | (395.454) |           |           |           |           | (.)       |          |           |           |           | (.)       |          |         |           |           |         |          |
| Constant                                  | -0.644*** | -0.867    | -0.989*** | -1.210*** | -0.664*** | -0.406*** |           |          |           |           |           |           |          |         |           |           |         |          |
|                                           | (0.132)   | (471.484) | (0.112)   | (0.106)   | (0.133)   | (0.131)   | -0.759*** | -0.829   | -1.052*** | -1.091*** | -0.689*** | -0.442*** | -0.146   | -0.258  | -0.496*** | -0.363*** | -0.244* | 0.434*** |
|                                           |           |           |           |           |           |           | (0.122)   | (.)      | (0.123)   | (0.108)   | (0.135)   | (0.095)   | (0.103)  | (.)     | (0.085)   | (0.077)   | (0.131) | (0.082)  |
| Observations                              | 23,682    | 26,809    | 22,222    | 23,756    | 22,222    | 23,756    | 23,682    | 26,809   | 22,222    | 23,756    | 22,222    | 23,756    | 23,682   | 26,809  | 22,222    | 23,756    | 22,222  | 23,756   |
| R-squared                                 | 0.142     | 0.103     | 0.139     | 0.099     | 0.104     | 0.058     | 0.159     | 0.120    | 0.157     | 0.117     | 0.124     | 0.062     | 0.058    | 0.053   | 0.054     | 0.052     | 0.026   | 0.012    |
| Number of epochid                         |           |           |           |           | 211       | 204       |           |          |           |           |           |           |          |         |           |           | 211     | 204      |

Robust standard errors in parentheses

\*\*\* p<0.01, \*\* p<0.05, \* p<0.1

Effect of membership of any social organisation on hypertension treatment and control among KNOWN hypertensives only

| VARIABLES           | Hypertension treatment        |                      |                               |                      |                                                                    |                      | Hypertension control          |                      |                               |                      |                                                                    |                     |
|---------------------|-------------------------------|----------------------|-------------------------------|----------------------|--------------------------------------------------------------------|----------------------|-------------------------------|----------------------|-------------------------------|----------------------|--------------------------------------------------------------------|---------------------|
|                     | OLS+individual+<br>HIC & UMIC |                      | OLS+individual+<br>LMIC & LIC |                      | OLS+individual+<br>community controls +<br>community fixed effects |                      | OLS+individual+<br>HIC & UMIC |                      | OLS+individual+<br>LMIC & LIC |                      | OLS+individual+<br>community controls +<br>community fixed effects |                     |
|                     | HIC & UMIC                    | LMIC & LIC           | HIC & UMIC                    | LMIC & LIC           | HIC & UMIC                                                         | LMIC & LIC           | HIC & UMIC                    | LMIC & LIC           | HIC & UMIC                    | LMIC & LIC           | HIC & UMIC                                                         | LMIC & LIC          |
| Membership          | 0.003<br>(0.007)              | 0.007<br>(0.012)     | -0.000<br>(0.007)             | 0.007<br>(0.012)     | -0.002<br>(0.007)                                                  | 0.014<br>(0.012)     | -0.011<br>(0.009)             | 0.035**<br>(0.015)   | -0.009<br>(0.009)             | 0.039**<br>(0.016)   | -0.001<br>(0.009)                                                  | 0.032*<br>(0.016)   |
| Female              | 0.022***<br>(0.008)           | 0.057***<br>(0.016)  | 0.021**<br>(0.009)            | 0.066***<br>(0.017)  | 0.025***<br>(0.008)                                                | 0.057***<br>(0.015)  | 0.094***<br>(0.009)           | 0.047***<br>(0.014)  | 0.092***<br>(0.009)           | 0.051***<br>(0.015)  | 0.096***<br>(0.009)                                                | 0.041***<br>(0.014) |
| Age                 | 0.024***<br>(0.005)           | 0.030***<br>(0.007)  | 0.024***<br>(0.005)           | 0.022***<br>(0.007)  | 0.024***<br>(0.005)                                                | 0.019***<br>(0.007)  | 0.005<br>(0.006)              | 0.004<br>(0.008)     | 0.005<br>(0.006)              | 0.003<br>(0.008)     | 0.006<br>(0.007)                                                   | -0.000<br>(0.008)   |
| Age squared         | -0.000***<br>(0.000)          | -0.000***<br>(0.000) | -0.000***<br>(0.000)          | -0.000***<br>(0.000) | -0.000***<br>(0.000)                                               | -0.000***<br>(0.000) | -0.000<br>(0.000)             | -0.000<br>(0.000)    | -0.000<br>(0.000)             | -0.000<br>(0.000)    | -0.000<br>(0.000)                                                  | -0.000<br>(0.000)   |
| Urban               | -0.010<br>(0.012)             | 0.025<br>(0.023)     | -0.010<br>(0.016)             | 0.027<br>(0.027)     | -0.118***<br>(0.020)                                               | 0.387***<br>(0.066)  | 0.015<br>(0.015)              | 0.021<br>(0.024)     | 0.020<br>(0.018)              | 0.031<br>(0.027)     | -0.023<br>(0.119)                                                  | -0.033<br>(0.089)   |
| Married             | 0.011<br>(0.007)              | -0.024*<br>(0.012)   | 0.011<br>(0.008)              | -0.021<br>(0.013)    | 0.012<br>(0.008)                                                   | -0.009<br>(0.013)    | 0.004<br>(0.010)              | -0.004<br>(0.016)    | -0.002<br>(0.010)             | -0.005<br>(0.017)    | 0.000<br>(0.011)                                                   | 0.011<br>(0.018)    |
| Secondary education | 0.024***<br>(0.008)           | 0.056***<br>(0.018)  | 0.029***<br>(0.009)           | 0.047***<br>(0.016)  | 0.028***<br>(0.008)                                                | 0.024*<br>(0.014)    | 0.014<br>(0.012)              | 0.052***<br>(0.018)  | 0.011<br>(0.012)              | 0.050***<br>(0.019)  | 0.009<br>(0.012)                                                   | 0.022<br>(0.020)    |
| Tertiary education  | 0.020*<br>(0.011)             | 0.090***<br>(0.019)  | 0.027**<br>(0.012)            | 0.085***<br>(0.019)  | 0.024***<br>(0.009)                                                | 0.064***<br>(0.017)  | 0.055***<br>(0.017)           | 0.108***<br>(0.027)  | 0.058***<br>(0.018)           | 0.112***<br>(0.028)  | 0.055***<br>(0.018)                                                | 0.085***<br>(0.028) |
| Wealth quintile 2   | 0.033<br>(0.029)              | 0.027<br>(0.018)     | 0.029<br>(0.032)              | 0.004<br>(0.021)     | 0.011<br>(0.033)                                                   | 0.005<br>(0.018)     | 0.040<br>(0.027)              | 0.027<br>(0.020)     | 0.031<br>(0.032)              | 0.015<br>(0.021)     | 0.021<br>(0.034)                                                   | 0.006<br>(0.021)    |
| Wealth quintile 3   | 0.085***<br>(0.029)           | 0.014<br>(0.023)     | 0.082**<br>(0.033)            | -0.013<br>(0.026)    | 0.052<br>(0.034)                                                   | -0.001<br>(0.023)    | 0.058*<br>(0.031)             | 0.040<br>(0.025)     | 0.049<br>(0.037)              | 0.024<br>(0.025)     | 0.019<br>(0.038)                                                   | 0.017<br>(0.026)    |
| Wealth quintile 4   | 0.084***<br>(0.028)           | 0.042*<br>(0.025)    | 0.081**<br>(0.032)            | 0.012<br>(0.030)     | 0.045<br>(0.033)                                                   | 0.022<br>(0.024)     | 0.086***<br>(0.030)           | 0.057*<br>(0.032)    | 0.079**<br>(0.034)            | 0.027<br>(0.029)     | 0.045<br>(0.036)                                                   | 0.019<br>(0.028)    |
| Wealth quintile 5   | 0.085***<br>(0.029)           | 0.034<br>(0.031)     | 0.080**<br>(0.032)            | 0.010<br>(0.036)     | 0.044<br>(0.034)                                                   | 0.020<br>(0.030)     | 0.074**<br>(0.032)            | 0.058<br>(0.036)     | 0.063*<br>(0.036)             | 0.028<br>(0.034)     | 0.029<br>(0.038)                                                   | 0.014<br>(0.035)    |
| Tobacco user        | -0.007<br>(0.007)             | 0.016<br>(0.012)     | -0.008<br>(0.007)             | 0.021<br>(0.013)     | -0.008<br>(0.007)                                                  | 0.020<br>(0.013)     | 0.022**<br>(0.009)            | 0.046**<br>(0.018)   | 0.027***<br>(0.009)           | 0.051***<br>(0.019)  | 0.027***<br>(0.009)                                                | 0.044**<br>(0.020)  |
| Alcohol user        | -0.027***<br>(0.009)          | -0.021<br>(0.019)    | -0.027***<br>(0.009)          | -0.025<br>(0.021)    | -0.019**<br>(0.009)                                                | -0.034**<br>(0.016)  | -0.032***<br>(0.010)          | -0.020<br>(0.021)    | -0.030***<br>(0.010)          | -0.016<br>(0.023)    | -0.023**<br>(0.010)                                                | -0.024<br>(0.021)   |
| Diabetes            | 0.056***<br>(0.007)           | 0.045***<br>(0.011)  | 0.059***<br>(0.007)           | 0.042***<br>(0.011)  | 0.057***<br>(0.007)                                                | 0.035***<br>(0.011)  | 0.008<br>(0.011)              | 0.016<br>(0.015)     | -0.002<br>(0.011)             | 0.013<br>(0.016)     | -0.007<br>(0.011)                                                  | 0.016<br>(0.017)    |
| Depressed           | -0.005<br>(0.006)             | -0.014<br>(0.012)    | -0.007<br>(0.006)             | -0.011<br>(0.011)    | -0.001<br>(0.006)                                                  | -0.000<br>(0.011)    | 0.033***<br>(0.009)           | 0.003<br>(0.017)     | 0.032***<br>(0.010)           | -0.001<br>(0.018)    | 0.038***<br>(0.009)                                                | 0.001<br>(0.018)    |
| Pregnant            | 0.071*<br>(0.040)             | 0.067<br>(0.057)     | 0.055<br>(0.041)              | 0.034<br>(0.058)     | 0.043<br>(0.041)                                                   | 0.054<br>(0.055)     | 0.063<br>(0.057)              | 0.139<br>(0.101)     | 0.056<br>(0.059)              | 0.111<br>(0.101)     | 0.029<br>(0.062)                                                   | 0.064<br>(0.106)    |
| Recently lost job   | -0.007<br>(0.018)             | -0.042<br>(0.038)    | -0.009<br>(0.018)             | -0.055<br>(0.039)    | -0.002<br>(0.018)                                                  | -0.053<br>(0.037)    | 0.021<br>(0.021)              | -0.063**<br>(0.026)  | 0.019<br>(0.021)              | -0.078***<br>(0.027) | 0.020<br>(0.021)                                                   | -0.042<br>(0.029)   |
| Obese               | 0.021***<br>(0.007)           | 0.006<br>(0.011)     | 0.020***<br>(0.007)           | 0.005<br>(0.011)     | 0.019***<br>(0.007)                                                | 0.007<br>(0.011)     | -0.039***<br>(0.009)          | -0.037***<br>(0.014) | -0.042***<br>(0.009)          | -0.037**<br>(0.014)  | -0.041***<br>(0.009)                                               | -0.036**<br>(0.014) |
| year6               | -0.094***                     | 0.051                | -0.123***                     | 0.033                | -0.056                                                             | 0.162                | -0.144***                     | -0.144***            | -0.128**                      | -0.131**             | -0.080                                                             | 0.071               |

|                                           |           |         |           |         |         |         |           |           |          |           |           |          |
|-------------------------------------------|-----------|---------|-----------|---------|---------|---------|-----------|-----------|----------|-----------|-----------|----------|
|                                           | (0.030)   | (0.058) | (0.037)   | (0.061) | (0.059) | (0.116) | (0.045)   | (0.052)   | (0.056)  | (0.052)   | (0.051)   | (0.102)  |
| year7                                     | -0.052    | 0.007   | -0.085**  | -0.009  | -0.018  | 0.144   | -0.111*** | -0.184*** | -0.099*  | -0.193*** | -0.061    | 0.087    |
|                                           | (0.032)   | (0.060) | (0.034)   | (0.063) | (0.058) | (0.121) | (0.042)   | (0.056)   | (0.053)  | (0.054)   | (0.046)   | (0.107)  |
| year8                                     | -0.041    | 0.037   | -0.074**  | 0.016   | -0.004  | 0.197   | -0.130*** | -0.018    | -0.117** | -0.009    | -0.093**  | 0.205*   |
|                                           | (0.029)   | (0.062) | (0.033)   | (0.065) | (0.057) | (0.123) | (0.041)   | (0.061)   | (0.052)  | (0.060)   | (0.044)   | (0.116)  |
| year9                                     | -0.069**  | -0.013  | -0.101*** | -0.032  | -0.018  | 0.010   | -0.114**  | -0.079    | -0.110** | -0.074    | -0.105*** | 0.106    |
|                                           | (0.032)   | (0.064) | (0.033)   | (0.070) | (0.056) | (0.253) | (0.044)   | (0.066)   | (0.052)  | (0.066)   | (0.039)   | (0.155)  |
| year10                                    | -0.050    | 0.009   | -0.111*   | -0.019  |         | 0.001   | -0.028    | -0.081    | -0.048   | -0.259**  |           | 0.038*** |
|                                           | (0.043)   | (0.072) | (0.058)   | (0.153) |         | (0.005) | (0.057)   | (0.068)   | (0.040)  | (0.100)   |           | (0.007)  |
| country3                                  | -0.117*** |         | -0.106*** |         |         |         | -0.097*   |           | -0.084   |           |           |          |
|                                           | (0.032)   |         | (0.036)   |         |         |         | (0.050)   |           | (0.054)  |           |           |          |
| country7                                  | 0.039**   |         | 0.046*    |         |         |         | 0.108***  |           | 0.100*** |           |           |          |
|                                           | (0.019)   |         | (0.026)   |         |         |         | (0.027)   |           | (0.037)  |           |           |          |
| country8                                  | -0.090*** |         | -0.103*** |         |         |         | -0.005    |           | -0.005   |           |           |          |
|                                           | (0.025)   |         | (0.029)   |         |         |         | (0.029)   |           | (0.037)  |           |           |          |
| country9                                  | -0.055*   |         | -0.059*   |         |         |         | 0.130***  |           | 0.123*** |           |           |          |
|                                           | (0.030)   |         | (0.034)   |         |         |         | (0.036)   |           | (0.041)  |           |           |          |
| country11                                 | -0.008    |         | -0.014    |         |         |         | 0.198***  |           | 0.193*** |           |           |          |
|                                           | (0.018)   |         | (0.026)   |         |         |         | (0.028)   |           | (0.038)  |           |           |          |
| country12                                 | -0.002    |         | 0.001     |         |         |         | 0.037     |           | 0.035    |           |           |          |
|                                           | (0.019)   |         | (0.024)   |         |         |         | (0.027)   |           | (0.033)  |           |           |          |
| country13                                 | -0.035*   |         | -0.040    |         |         |         | -0.048    |           | -0.054   |           |           |          |
|                                           | (0.020)   |         | (0.026)   |         |         |         | (0.038)   |           | (0.046)  |           |           |          |
| country14                                 | -0.113*** |         | -0.100*** |         |         |         | 0.005     |           | 0.011    |           |           |          |
|                                           | (0.025)   |         | (0.035)   |         |         |         | (0.033)   |           | (0.046)  |           |           |          |
| country16                                 | -0.069*** |         | -0.070**  |         |         |         | 0.097***  |           | 0.105**  |           |           |          |
|                                           | (0.021)   |         | (0.027)   |         |         |         | (0.035)   |           | (0.042)  |           |           |          |
| Public health facility available          |           |         | -0.000    | 0.035   |         |         |           |           | 0.057*   | -0.093    |           |          |
|                                           |           |         | (0.027)   | (0.136) |         |         |           |           | (0.033)  | (0.070)   |           |          |
| Private health facility available         |           |         | -0.011    | 0.037   |         |         |           |           | -0.019   | 0.003     |           |          |
|                                           |           |         | (0.018)   | (0.045) |         |         |           |           | (0.021)  | (0.041)   |           |          |
| Any antihypertensive drug available       |           |         | 0.034     | 0.134   |         |         |           |           | 0.009    | 0.097*    |           |          |
|                                           |           |         | (0.065)   | (0.096) |         |         |           |           | (0.052)  | (0.059)   |           |          |
| Number of antihypertensive drug available |           |         | 0.004     | -0.012  |         |         |           |           | 0.003    | -0.030*** |           |          |
|                                           |           |         | (0.006)   | (0.008) |         |         |           |           | (0.008)  | (0.008)   |           |          |
| Electric street lighting present          |           |         | 0.041     | 0.131*  |         |         |           |           | 0.031    | 0.097***  |           |          |
|                                           |           |         | (0.038)   | (0.070) |         |         |           |           | (0.034)  | (0.027)   |           |          |
| Traffic lights present                    |           |         | -0.003    | -0.014  |         |         |           |           | 0.008    | 0.039     |           |          |
|                                           |           |         | (0.021)   | (0.025) |         |         |           |           | (0.019)  | (0.024)   |           |          |
| Completeness of road paving               |           |         | 0.004     | 0.021   |         |         |           |           | -0.014   | -0.020    |           |          |
|                                           |           |         | (0.021)   | (0.021) |         |         |           |           | (0.023)  | (0.019)   |           |          |
| year5                                     | -0.007    | -0.027  |           | -0.052  | -0.018  | -0.001  | -0.026    | -0.193*** |          | -0.194*** | 0.076     | -0.054   |
|                                           | (0.044)   | (0.063) |           | (0.062) | (0.073) | (0.111) | (0.060)   | (0.055)   |          | (0.055)   | (0.083)   | (0.104)  |
| year12                                    | -0.072    |         |           |         |         |         | 0.211**   |           |          |           |           |          |
|                                           | (0.074)   |         |           |         |         |         | (0.092)   |           |          |           |           |          |
| year13                                    | -0.032    | -0.130  |           |         |         |         | 0.163***  | -0.112    |          |           |           |          |
|                                           | (0.032)   | (0.175) |           |         |         |         | (0.048)   | (0.082)   |          |           |           |          |
| year2                                     |           | 0.052   |           | 0.048   |         | 0.086*  |           | -0.029    |          | -0.014    |           | 0.001    |

|                   |         |           |           |         |           |           |         |         |         |         |         |         |  |
|-------------------|---------|-----------|-----------|---------|-----------|-----------|---------|---------|---------|---------|---------|---------|--|
| year3             |         | (0.058)   | (0.058)   | (0.044) | (0.054)   | (0.054)   | (0.042) |         |         |         |         |         |  |
|                   |         | -0.068    | -0.095    | -0.082  | -0.158**  | -0.157**  | -0.055  |         |         |         |         |         |  |
|                   |         | (0.129)   | (0.124)   | (0.057) | (0.073)   | (0.075)   | (0.090) |         |         |         |         |         |  |
| year4             |         | -0.031    | -0.046    | 0.037   | -0.115*   | -0.100*   | 0.019   |         |         |         |         |         |  |
|                   |         | (0.067)   | (0.065)   | (0.091) | (0.058)   | (0.059)   | (0.095) |         |         |         |         |         |  |
| year11            |         | 0.016     | -0.015    |         | -0.111    | -0.291*** |         |         |         |         |         |         |  |
|                   |         | (0.074)   | (0.154)   |         | (0.069)   | (0.100)   |         |         |         |         |         |         |  |
| year14            |         | -0.041    |           |         | -0.348*** |           |         |         |         |         |         |         |  |
|                   |         | (0.184)   |           |         | (0.085)   |           |         |         |         |         |         |         |  |
| country4          |         | 0.059***  | 0.036*    |         | -0.007    | -0.013    |         |         |         |         |         |         |  |
|                   |         | (0.022)   | (0.021)   |         | (0.031)   | (0.034)   |         |         |         |         |         |         |  |
| country6          |         | -0.302*** | -0.279*** |         | -0.126*** | -0.116**  |         |         |         |         |         |         |  |
|                   |         | (0.024)   | (0.064)   |         | (0.036)   | (0.048)   |         |         |         |         |         |         |  |
| country10         |         | 0.052**   | 0.042*    |         | -0.049    | -0.031    |         |         |         |         |         |         |  |
|                   |         | (0.026)   | (0.023)   |         | (0.040)   | (0.038)   |         |         |         |         |         |         |  |
| country15         |         | -0.206*** |           |         | -0.277*** |           |         |         |         |         |         |         |  |
|                   |         | (0.045)   |           |         | (0.049)   |           |         |         |         |         |         |         |  |
| country17         |         | -0.044    | -0.054    |         | -0.046    | -0.082    |         |         |         |         |         |         |  |
|                   |         | (0.046)   | (0.040)   |         | (0.050)   | (0.054)   |         |         |         |         |         |         |  |
| country18         |         | -0.519*** |           |         | -0.285*** |           |         |         |         |         |         |         |  |
|                   |         | (0.133)   |           |         | (0.095)   |           |         |         |         |         |         |         |  |
| country21         |         | 0.119     |           |         | -0.002    |           |         |         |         |         |         |         |  |
|                   |         | (0.186)   |           |         | (0.098)   |           |         |         |         |         |         |         |  |
| Constant          | 0.024   | -0.212    | -0.027    | -0.267  | 0.059     | -0.223    | 0.155   | 0.327   | 0.094   | 0.480*  | 0.227   | 0.308   |  |
|                   | (0.143) | (0.203)   | (0.187)   | (0.285) | (0.176)   | (0.210)   | (0.180) | (0.210) | (0.204) | (0.247) | (0.234) | (0.242) |  |
| Observations      | 12,403  | 5,387     | 11,683    | 4,912   | 11,683    | 4,912     | 12,403  | 5,387   | 11,683  | 4,912   | 11,683  | 4,912   |  |
| R-squared         | 0.071   | 0.106     | 0.071     | 0.091   | 0.040     | 0.042     | 0.051   | 0.046   | 0.050   | 0.045   | 0.019   | 0.015   |  |
| Number of epochid |         |           |           |         | 209       | 160       |         |         |         |         | 209     | 160     |  |

Robust standard errors in parentheses

\*\*\* p<0.01, \*\* p<0.05, \* p<0.1

Effect of trust in people on hypertension treatment and control among KNOWN hypertensives only

| VARIABLES           | Hypertension treatment   |                      |                                    |                      |                                                              |                      | Hypertension control     |                      |                                    |                      |                                                              |                      |
|---------------------|--------------------------|----------------------|------------------------------------|----------------------|--------------------------------------------------------------|----------------------|--------------------------|----------------------|------------------------------------|----------------------|--------------------------------------------------------------|----------------------|
|                     | OLS+individual+ controls |                      | OLS+individual+ community controls |                      | OLS+individual+ community controls + community fixed effects |                      | OLS+individual+ controls |                      | OLS+individual+ community controls |                      | OLS+individual+ community controls + community fixed effects |                      |
|                     | HIC & UMIC               | LMIC & LIC           | HIC & UMIC                         | LMIC & LIC           | HIC & UMIC                                                   | LMIC & LIC           | HIC & UMIC               | LMIC & LIC           | HIC & UMIC                         | LMIC & LIC           | HIC & UMIC                                                   | LMIC & LIC           |
| Trust in people     | 0.006<br>(0.007)         | -0.012<br>(0.009)    | 0.001<br>(0.007)                   | -0.009<br>(0.009)    | 0.005<br>(0.007)                                             | -0.007<br>(0.009)    | 0.011<br>(0.010)         | 0.001<br>(0.010)     | 0.009<br>(0.011)                   | 0.003<br>(0.010)     | 0.007<br>(0.010)                                             | 0.004<br>(0.008)     |
| Female              | 0.022***<br>(0.008)      | 0.046***<br>(0.010)  | 0.021**<br>(0.009)                 | 0.051***<br>(0.010)  | 0.025***<br>(0.008)                                          | 0.038***<br>(0.010)  | 0.093***<br>(0.009)      | 0.019*<br>(0.011)    | 0.092***<br>(0.009)                | 0.018<br>(0.011)     | 0.096***<br>(0.009)                                          | 0.008<br>(0.010)     |
| Age                 | 0.024***<br>(0.005)      | 0.016***<br>(0.005)  | 0.023***<br>(0.005)                | 0.013***<br>(0.005)  | 0.024***<br>(0.005)                                          | 0.013***<br>(0.005)  | 0.005<br>(0.006)         | 0.002<br>(0.005)     | 0.005<br>(0.006)                   | 0.001<br>(0.006)     | 0.006<br>(0.007)                                             | -0.001<br>(0.005)    |
| Age squared         | -0.000***<br>(0.000)     | -0.000**<br>(0.000)  | -0.000***<br>(0.000)               | -0.000*<br>(0.000)   | -0.000***<br>(0.000)                                         | -0.000*<br>(0.000)   | -0.000<br>(0.000)        | -0.000<br>(0.000)    | -0.000<br>(0.000)                  | -0.000<br>(0.000)    | -0.000<br>(0.000)                                            | -0.000<br>(0.000)    |
| Urban               | -0.011<br>(0.012)        | 0.053***<br>(0.015)  | -0.010<br>(0.016)                  | 0.070***<br>(0.022)  | -0.116***<br>(0.020)                                         | -0.195***<br>(0.021) | 0.015<br>(0.015)         | 0.054***<br>(0.019)  | 0.020<br>(0.018)                   | 0.052*<br>(0.027)    | -0.020<br>(0.119)                                            | -0.815***<br>(0.042) |
| Married             | 0.012<br>(0.007)         | -0.017<br>(0.011)    | 0.011<br>(0.008)                   | -0.018<br>(0.011)    | 0.012<br>(0.008)                                             | -0.020*<br>(0.011)   | 0.004<br>(0.010)         | -0.000<br>(0.013)    | -0.001<br>(0.010)                  | -0.005<br>(0.014)    | 0.001<br>(0.011)                                             | -0.001<br>(0.014)    |
| Secondary education | 0.024***<br>(0.008)      | 0.031***<br>(0.010)  | 0.029***<br>(0.009)                | 0.028***<br>(0.011)  | 0.028***<br>(0.008)                                          | 0.012<br>(0.009)     | 0.014<br>(0.012)         | 0.033***<br>(0.010)  | 0.010<br>(0.012)                   | 0.034***<br>(0.011)  | 0.009<br>(0.012)                                             | 0.016*<br>(0.009)    |
| Tertiary education  | 0.020*<br>(0.011)        | 0.057***<br>(0.013)  | 0.027**<br>(0.012)                 | 0.054***<br>(0.014)  | 0.024**<br>(0.009)                                           | 0.042***<br>(0.013)  | 0.054***<br>(0.017)      | 0.058***<br>(0.018)  | 0.056***<br>(0.018)                | 0.058***<br>(0.019)  | 0.055***<br>(0.018)                                          | 0.055***<br>(0.017)  |
| Wealth quintile 2   | 0.031<br>(0.029)         | 0.042**<br>(0.021)   | 0.030<br>(0.033)                   | 0.030<br>(0.021)     | 0.012<br>(0.034)                                             | 0.010<br>(0.016)     | 0.033<br>(0.028)         | 0.015<br>(0.014)     | 0.024<br>(0.034)                   | 0.005<br>(0.016)     | 0.014<br>(0.035)                                             | 0.006<br>(0.016)     |
| Wealth quintile 3   | 0.085***<br>(0.030)      | 0.055**<br>(0.023)   | 0.083**<br>(0.034)                 | 0.047**<br>(0.023)   | 0.053<br>(0.034)                                             | 0.010<br>(0.018)     | 0.052<br>(0.032)         | 0.055***<br>(0.017)  | 0.043<br>(0.038)                   | 0.039**<br>(0.018)   | 0.012<br>(0.040)                                             | 0.025<br>(0.017)     |
| Wealth quintile 4   | 0.084***<br>(0.028)      | 0.064***<br>(0.022)  | 0.082**<br>(0.032)                 | 0.054**<br>(0.022)   | 0.046<br>(0.033)                                             | 0.013<br>(0.019)     | 0.079***<br>(0.030)      | 0.072***<br>(0.019)  | 0.071**<br>(0.036)                 | 0.054***<br>(0.019)  | 0.038<br>(0.038)                                             | 0.035*<br>(0.019)    |
| Wealth quintile 5   | 0.086***<br>(0.029)      | 0.051*<br>(0.027)    | 0.082**<br>(0.033)                 | 0.039<br>(0.027)     | 0.045<br>(0.034)                                             | 0.006<br>(0.026)     | 0.066**<br>(0.032)       | 0.070***<br>(0.025)  | 0.056<br>(0.037)                   | 0.052**<br>(0.025)   | 0.022<br>(0.040)                                             | 0.033<br>(0.024)     |
| Tobacco user        | -0.007<br>(0.007)        | 0.006<br>(0.012)     | -0.008<br>(0.007)                  | 0.016<br>(0.012)     | -0.008<br>(0.007)                                            | -0.001<br>(0.012)    | 0.023**<br>(0.009)       | 0.043***<br>(0.012)  | 0.028***<br>(0.009)                | 0.044***<br>(0.013)  | 0.028***<br>(0.009)                                          | 0.035***<br>(0.013)  |
| Alcohol user        | -0.027***<br>(0.009)     | -0.038***<br>(0.012) | -0.026***<br>(0.009)               | -0.042***<br>(0.012) | -0.018**<br>(0.009)                                          | -0.032***<br>(0.011) | -0.032***<br>(0.010)     | -0.032**<br>(0.014)  | -0.029***<br>(0.010)               | -0.033**<br>(0.014)  | -0.023**<br>(0.010)                                          | -0.027**<br>(0.013)  |
| Diabetes            | 0.056***<br>(0.007)      | 0.043***<br>(0.008)  | 0.059***<br>(0.007)                | 0.048***<br>(0.008)  | 0.057***<br>(0.007)                                          | 0.045***<br>(0.008)  | 0.009<br>(0.011)         | 0.035***<br>(0.011)  | -0.001<br>(0.011)                  | 0.037***<br>(0.012)  | -0.007<br>(0.011)                                            | 0.031***<br>(0.012)  |
| Depressed           | -0.005<br>(0.006)        | -0.020*<br>(0.012)   | -0.007<br>(0.006)                  | -0.020*<br>(0.012)   | -0.001<br>(0.006)                                            | -0.012<br>(0.012)    | 0.033***<br>(0.009)      | -0.002<br>(0.015)    | 0.032***<br>(0.010)                | -0.004<br>(0.016)    | 0.039***<br>(0.009)                                          | 0.007<br>(0.016)     |
| Pregnant            | 0.071*<br>(0.040)        | -0.004<br>(0.062)    | 0.055<br>(0.041)                   | -0.015<br>(0.058)    | 0.044<br>(0.041)                                             | 0.023<br>(0.051)     | 0.064<br>(0.057)         | 0.105<br>(0.065)     | 0.057<br>(0.059)                   | 0.105<br>(0.066)     | 0.030<br>(0.062)                                             | 0.097<br>(0.072)     |
| Recently lost job   | -0.008<br>(0.018)        | -0.077***<br>(0.028) | -0.009<br>(0.018)                  | -0.072**<br>(0.029)  | -0.002<br>(0.018)                                            | -0.067**<br>(0.027)  | 0.022<br>(0.021)         | -0.027<br>(0.026)    | 0.019<br>(0.021)                   | -0.037<br>(0.029)    | 0.020<br>(0.021)                                             | -0.039<br>(0.033)    |
| Obese               | 0.021***<br>(0.007)      | 0.013<br>(0.009)     | 0.020***<br>(0.007)                | 0.011<br>(0.010)     | 0.019***<br>(0.007)                                          | 0.013<br>(0.009)     | -0.038***<br>(0.009)     | -0.030***<br>(0.010) | -0.042***<br>(0.009)               | -0.028***<br>(0.011) | -0.040***<br>(0.009)                                         | -0.026**<br>(0.010)  |
| year6               | -0.095***                | -0.018               | -0.124***                          | -0.082***            | -0.059                                                       | 0.471***             | -0.144***                | -0.023               | -0.128**                           | -0.657***            | -0.081                                                       | -0.135***            |

|                                           |           |             |           |           |         |          |           |             |          |           |           |           |
|-------------------------------------------|-----------|-------------|-----------|-----------|---------|----------|-----------|-------------|----------|-----------|-----------|-----------|
|                                           | (0.030)   | (1,183.024) | (0.037)   | (0.029)   | (0.057) | (0.016)  | (0.045)   | (2,082.193) | (0.055)  | (0.037)   | (0.052)   | (0.018)   |
| year7                                     | -0.054*   | -0.046      | -0.086**  | -0.101*** | -0.022  | 0.446*** | -0.111*** | -0.037      | -0.100*  | -0.660*** | -0.061    | -0.148*** |
|                                           | (0.032)   | (1,021.090) | (0.035)   | (0.028)   | (0.055) | (0.021)  | (0.042)   | (1,527.095) | (0.052)  | (0.038)   | (0.047)   | (0.032)   |
| year8                                     | -0.042    | -0.058      | -0.075**  | -0.107*** | -0.007  | 0.482*** | -0.129*** | 0.076       | -0.117** | -0.542*** | -0.093**  | -0.031    |
|                                           | (0.029)   | (851.130)   | (0.034)   | (0.034)   | (0.055) | (0.025)  | (0.041)   | (1,940.557) | (0.051)  | (0.047)   | (0.045)   | (0.041)   |
| year9                                     | -0.070**  | -0.095      | -0.102*** | -0.146*** | -0.021  | 0.444*** | -0.114**  | 0.008       | -0.110** | -0.607*** | -0.107*** | -0.070    |
|                                           | (0.032)   | (1,574.127) | (0.033)   | (0.035)   | (0.054) | (0.028)  | (0.044)   | (2,073.566) | (0.050)  | (0.047)   | (0.040)   | (0.076)   |
| year10                                    | -0.049    | -0.149      | -0.110*   | -0.132    |         | -0.008   | -0.025    | 0.007       | -0.042   | -0.567*** |           | 0.021     |
|                                           | (0.043)   | (1,191.141) | (0.058)   | (0.096)   |         | (0.018)  | (0.057)   | (2,103.900) | (0.039)  | (0.053)   |           | (0.020)   |
| country5                                  |           |             | 0.109***  |           |         |          |           |             | 0.096*   |           |           |           |
|                                           |           |             | (0.037)   |           |         |          |           |             | (0.053)  |           |           |           |
| country7                                  | 0.040**   |             | 0.155***  |           |         |          | 0.103***  |             | 0.192*** |           |           |           |
|                                           | (0.018)   |             | (0.046)   |           |         |          | (0.027)   |             | (0.056)  |           |           |           |
| country8                                  | -0.090*** |             | 0.005     |           |         |          | -0.012    |             | 0.087    |           |           |           |
|                                           | (0.025)   |             | (0.040)   |           |         |          | (0.029)   |             | (0.053)  |           |           |           |
| country9                                  | -0.053*   |             | 0.049     |           |         |          | 0.128***  |             | 0.219*** |           |           |           |
|                                           | (0.029)   |             | (0.046)   |           |         |          | (0.035)   |             | (0.058)  |           |           |           |
| country11                                 | -0.006    |             | 0.095**   |           |         |          | 0.193***  |             | 0.286*** |           |           |           |
|                                           | (0.018)   |             | (0.043)   |           |         |          | (0.027)   |             | (0.054)  |           |           |           |
| country12                                 | 0.001     |             | 0.110***  |           |         |          | 0.039     |             | 0.133*** |           |           |           |
|                                           | (0.019)   |             | (0.038)   |           |         |          | (0.027)   |             | (0.051)  |           |           |           |
| country13                                 | -0.034*   |             | 0.068     |           |         |          | -0.049    |             | 0.042    |           |           |           |
|                                           | (0.020)   |             | (0.043)   |           |         |          | (0.039)   |             | (0.061)  |           |           |           |
| country14                                 | -0.109*** |             | 0.009     |           |         |          | 0.004     |             | 0.106**  |           |           |           |
|                                           | (0.025)   |             | (0.042)   |           |         |          | (0.033)   |             | (0.051)  |           |           |           |
| country16                                 | -0.068*** |             | 0.038     |           |         |          | 0.096***  |             | 0.201*** |           |           |           |
|                                           | (0.021)   |             | (0.039)   |           |         |          | (0.035)   |             | (0.056)  |           |           |           |
| Public health facility available          |           |             | 0.000     | 0.081***  |         |          |           |             | 0.058*   | 0.048     |           |           |
|                                           |           |             | (0.027)   | (0.030)   |         |          |           |             | (0.033)  | (0.033)   |           |           |
| Private health facility available         |           |             | -0.010    | -0.039    |         |          |           |             | -0.019   | 0.012     |           |           |
|                                           |           |             | (0.017)   | (0.025)   |         |          |           |             | (0.021)  | (0.025)   |           |           |
| Any antihypertensive drug available       |           |             | 0.033     | -0.097*** |         |          |           |             | 0.008    | -0.077    |           |           |
|                                           |           |             | (0.065)   | (0.033)   |         |          |           |             | (0.052)  | (0.048)   |           |           |
| Number of antihypertensive drug available |           |             | 0.004     | 0.007     |         |          |           |             | 0.003    | 0.010     |           |           |
|                                           |           |             | (0.006)   | (0.005)   |         |          |           |             | (0.008)  | (0.008)   |           |           |
| Electric street lighting present          |           |             | 0.042     | 0.040*    |         |          |           |             | 0.028    | 0.033     |           |           |
|                                           |           |             | (0.039)   | (0.021)   |         |          |           |             | (0.034)  | (0.029)   |           |           |
| Traffic lights present                    |           |             | -0.003    | -0.015    |         |          |           |             | 0.008    | -0.007    |           |           |
|                                           |           |             | (0.021)   | (0.021)   |         |          |           |             | (0.020)  | (0.030)   |           |           |
| Completeness of road paving               |           |             | 0.004     | 0.015     |         |          |           |             | -0.014   | -0.016    |           |           |
|                                           |           |             | (0.021)   | (0.015)   |         |          |           |             | (0.023)  | (0.019)   |           |           |
| year5                                     | -0.005    | -0.016      |           | -0.093*** | -0.020  | 0.478*** | -0.024    | -0.024      |          | -0.655*** | 0.075     | -0.160**  |
|                                           | (0.044)   | (1,281.369) |           | (0.032)   | (0.071) | (0.031)  | (0.060)   | (1,977.001) |          | (0.042)   | (0.083)   | (0.062)   |
| year12                                    | -0.074    | -0.561      |           |           |         |          | 0.209**   | -0.130      |          |           |           |           |
|                                           | (0.074)   | (1,240.429) |           |           |         |          | (0.093)   | (2,182.998) |          |           |           |           |
| year13                                    | -0.033    | -0.715      |           |           |         |          | 0.163***  | -0.271      |          |           |           |           |
|                                           | (0.032)   | (1,635.235) |           |           |         |          | (0.048)   | (2,097.121) |          |           |           |           |
| country3                                  | -0.115*** |             |           |           |         |          | -0.110**  |             |          |           |           |           |

|                   |         |             |           |         |          |         |         |             |           |          |         |          |
|-------------------|---------|-------------|-----------|---------|----------|---------|---------|-------------|-----------|----------|---------|----------|
| year4             | (0.032) | 0.032       |           |         | 0.537*** |         | (0.050) | 0.624       |           |          |         | 0.481*** |
|                   |         | (1,444.948) |           |         | (0.030)  |         |         | (1,998.893) |           |          |         | (0.046)  |
| year11            |         | -0.144      | -0.130    |         |          |         |         | -0.009      | -0.585*** |          |         |          |
|                   |         | (1,265.866) | (0.088)   |         |          |         |         | (1,868.602) | (0.057)   |          |         |          |
| year14            |         | -0.617      |           |         |          |         |         | -0.507      |           |          |         |          |
|                   |         | (374.024)   |           |         |          |         |         | (2,161.679) |           |          |         |          |
| country2          |         | -0.045***   | -0.022    |         |          |         |         | -0.134***   | -0.096**  |          |         |          |
|                   |         | (0.016)     | (0.025)   |         |          |         |         | (0.028)     | (0.043)   |          |         |          |
| country4          |         | 0.064***    | 0.039     |         |          |         |         | 0.007       | 0.005     |          |         |          |
|                   |         | (0.023)     | (0.024)   |         |          |         |         | (0.034)     | (0.036)   |          |         |          |
| country6          |         | -0.276***   | -0.253*** |         |          |         |         | -0.090**    | -0.065    |          |         |          |
|                   |         | (0.026)     | (0.047)   |         |          |         |         | (0.037)     | (0.052)   |          |         |          |
| country10         |         | 0.060***    | 0.043*    |         |          |         |         | -0.021      | -0.032    |          |         |          |
|                   |         | (0.023)     | (0.025)   |         |          |         |         | (0.040)     | (0.042)   |          |         |          |
| country15         |         | -0.162***   |           |         |          |         |         | -0.227***   |           |          |         |          |
|                   |         | (0.047)     |           |         |          |         |         | (0.049)     |           |          |         |          |
| country17         |         | -0.001      | 0.014     |         |          |         |         | -0.020      | -0.006    |          |         |          |
|                   |         | (0.047)     | (0.056)   |         |          |         |         | (0.040)     | (0.045)   |          |         |          |
| country21         |         | 0.632***    |           |         |          |         |         | 0.282***    |           |          |         |          |
|                   |         | (0.127)     |           |         |          |         |         | (0.023)     |           |          |         |          |
| Constant          | 0.022   | 0.186       | -0.134    | 0.278*  | 0.058    | -0.001  | 0.155   | 0.205       | 0.004     | 0.865*** | 0.228   | 0.937*** |
|                   | (0.143) | (1,181.332) | (0.190)   | (0.154) | (0.175)  | (0.141) | (0.180) | (2,333.436) | (0.191)   | (0.167)  | (0.234) | (0.156)  |
| Observations      | 12,412  | 11,589      | 11,679    | 10,516  | 11,679   | 10,516  | 12,412  | 11,589      | 11,679    | 10,516   | 11,679  | 10,516   |
| R-squared         | 0.070   | 0.071       | 0.071     | 0.067   | 0.040    | 0.019   | 0.051   | 0.054       | 0.050     | 0.053    | 0.019   | 0.009    |
| Number of epochid |         |             |           |         | 209      | 202     |         |             |           |          | 209     | 202      |

Robust standard errors in parentheses

\*\*\* p<0.01, \*\* p<0.05, \* p<0.1

Effect of trust in organisations on hypertension treatment and control among KNOWN hypertensives only

| VARIABLES              | Hypertension treatment                |                      |                                       |                      |                                                                    |                      | Hypertension control                  |                      |                                       |                     |                                                                    |                      |
|------------------------|---------------------------------------|----------------------|---------------------------------------|----------------------|--------------------------------------------------------------------|----------------------|---------------------------------------|----------------------|---------------------------------------|---------------------|--------------------------------------------------------------------|----------------------|
|                        | OLS+individual+<br>community controls |                      | OLS+individual+<br>community controls |                      | OLS+individual+<br>community controls +<br>community fixed effects |                      | OLS+individual+<br>community controls |                      | OLS+individual+<br>community controls |                     | OLS+individual+<br>community controls +<br>community fixed effects |                      |
|                        | HIC & UMIC                            | LMIC & LIC           | HIC & UMIC                            | LMIC & LIC           | HIC & UMIC                                                         | LMIC & LIC           | HIC & UMIC                            | LMIC & LIC           | HIC & UMIC                            | LMIC & LIC          | HIC & UMIC                                                         | LMIC & LIC           |
| Trust in organisations | -0.013<br>(0.010)                     | -0.036<br>(0.028)    | -0.017*<br>(0.010)                    | -0.025<br>(0.029)    | -0.014<br>(0.009)                                                  | -0.037<br>(0.029)    | -0.003<br>(0.011)                     | 0.007<br>(0.026)     | -0.001<br>(0.012)                     | 0.002<br>(0.027)    | 0.008<br>(0.012)                                                   | -0.002<br>(0.029)    |
| Female                 | 0.022***<br>(0.008)                   | 0.047***<br>(0.010)  | 0.020**<br>(0.009)                    | 0.051***<br>(0.010)  | 0.025***<br>(0.008)                                                | 0.038***<br>(0.010)  | 0.093***<br>(0.009)                   | 0.020*<br>(0.011)    | 0.092***<br>(0.009)                   | 0.019*<br>(0.011)   | 0.095***<br>(0.009)                                                | 0.009<br>(0.010)     |
| Age                    | 0.024***<br>(0.005)                   | 0.016***<br>(0.005)  | 0.024***<br>(0.005)                   | 0.013***<br>(0.005)  | 0.024***<br>(0.005)                                                | 0.013***<br>(0.005)  | 0.004<br>(0.006)                      | 0.002<br>(0.005)     | 0.005<br>(0.006)                      | 0.001<br>(0.006)    | 0.006<br>(0.007)                                                   | -0.001<br>(0.005)    |
| Age squared            | -0.000***<br>(0.000)                  | -0.000**<br>(0.000)  | -0.000***<br>(0.000)                  | -0.000***<br>(0.000) | -0.000***<br>(0.000)                                               | -0.000*<br>(0.000)   | -0.000<br>(0.000)                     | -0.000<br>(0.000)    | -0.000<br>(0.000)                     | -0.000<br>(0.000)   | -0.000<br>(0.000)                                                  | -0.000<br>(0.000)    |
| Urban                  | -0.012<br>(0.012)                     | 0.054***<br>(0.015)  | -0.012<br>(0.015)                     | 0.071***<br>(0.022)  | -0.120***<br>(0.021)                                               | -0.202***<br>(0.022) | 0.015<br>(0.015)                      | 0.053***<br>(0.019)  | 0.020<br>(0.018)                      | 0.052*<br>(0.027)   | -0.023<br>(0.120)                                                  | -0.811***<br>(0.043) |
| Married                | 0.011<br>(0.007)                      | -0.018*<br>(0.011)   | 0.010<br>(0.008)                      | -0.019<br>(0.012)    | 0.012<br>(0.008)                                                   | -0.020*<br>(0.011)   | 0.004<br>(0.010)                      | 0.000<br>(0.013)     | -0.002<br>(0.010)                     | -0.004<br>(0.014)   | 0.000<br>(0.011)                                                   | -0.000<br>(0.014)    |
| Secondary education    | 0.024***<br>(0.008)                   | 0.032***<br>(0.010)  | 0.028***<br>(0.009)                   | 0.030***<br>(0.011)  | 0.027***<br>(0.008)                                                | 0.013<br>(0.009)     | 0.016<br>(0.012)                      | 0.035***<br>(0.010)  | 0.012<br>(0.012)                      | 0.036***<br>(0.011) | 0.012<br>(0.012)                                                   | 0.018**<br>(0.009)   |
| Tertiary education     | 0.022**<br>(0.011)                    | 0.060***<br>(0.013)  | 0.029**<br>(0.011)                    | 0.056***<br>(0.014)  | 0.026***<br>(0.009)                                                | 0.043***<br>(0.013)  | 0.056***<br>(0.017)                   | 0.061***<br>(0.018)  | 0.058***<br>(0.019)                   | 0.060***<br>(0.019) | 0.057***<br>(0.018)                                                | 0.056***<br>(0.017)  |
| Wealth quintile 2      | 0.040<br>(0.027)                      | 0.043**<br>(0.021)   | 0.035<br>(0.029)                      | 0.032<br>(0.021)     | 0.020<br>(0.032)                                                   | 0.011<br>(0.017)     | 0.042<br>(0.028)                      | 0.017<br>(0.014)     | 0.033<br>(0.034)                      | 0.006<br>(0.016)    | 0.023<br>(0.035)                                                   | 0.005<br>(0.016)     |
| Wealth quintile 3      | 0.091***<br>(0.029)                   | 0.054**<br>(0.023)   | 0.087***<br>(0.031)                   | 0.048**<br>(0.023)   | 0.061*<br>(0.033)                                                  | 0.009<br>(0.018)     | 0.058*<br>(0.033)                     | 0.056***<br>(0.017)  | 0.050<br>(0.039)                      | 0.040**<br>(0.018)  | 0.020<br>(0.040)                                                   | 0.024<br>(0.017)     |
| Wealth quintile 4      | 0.091***<br>(0.027)                   | 0.064***<br>(0.022)  | 0.087***<br>(0.029)                   | 0.055**<br>(0.023)   | 0.054*<br>(0.032)                                                  | 0.013<br>(0.019)     | 0.085***<br>(0.031)                   | 0.072***<br>(0.019)  | 0.079**<br>(0.036)                    | 0.055***<br>(0.019) | 0.046<br>(0.038)                                                   | 0.035*<br>(0.019)    |
| Wealth quintile 5      | 0.092***<br>(0.028)                   | 0.052*<br>(0.027)    | 0.086***<br>(0.030)                   | 0.040<br>(0.028)     | 0.053<br>(0.033)                                                   | 0.006<br>(0.025)     | 0.073**<br>(0.033)                    | 0.070***<br>(0.025)  | 0.063*<br>(0.038)                     | 0.052**<br>(0.026)  | 0.028<br>(0.040)                                                   | 0.032<br>(0.024)     |
| Tobacco user           | -0.007<br>(0.007)                     | 0.007<br>(0.011)     | -0.008<br>(0.007)                     | 0.016<br>(0.012)     | -0.008<br>(0.007)                                                  | -0.002<br>(0.012)    | 0.022**<br>(0.009)                    | 0.045***<br>(0.012)  | 0.027***<br>(0.009)                   | 0.047***<br>(0.013) | 0.027***<br>(0.009)                                                | 0.037***<br>(0.013)  |
| Alcohol user           | -0.026***<br>(0.009)                  | -0.038***<br>(0.012) | -0.026***<br>(0.009)                  | -0.042***<br>(0.012) | -0.018**<br>(0.009)                                                | -0.032***<br>(0.011) | -0.033***<br>(0.010)                  | -0.033**<br>(0.014)  | -0.030***<br>(0.010)                  | -0.035**<br>(0.014) | -0.023**<br>(0.010)                                                | -0.029**<br>(0.013)  |
| Diabetes               | 0.056***<br>(0.007)                   | 0.043***<br>(0.008)  | 0.058***<br>(0.007)                   | 0.048***<br>(0.008)  | 0.057***<br>(0.007)                                                | 0.045***<br>(0.008)  | 0.007<br>(0.011)                      | 0.036***<br>(0.011)  | -0.003<br>(0.011)                     | 0.038***<br>(0.012) | -0.008<br>(0.011)                                                  | 0.032***<br>(0.012)  |
| Depressed              | -0.004<br>(0.006)                     | -0.020*<br>(0.012)   | -0.006<br>(0.006)                     | -0.019<br>(0.012)    | 0.000<br>(0.006)                                                   | -0.011<br>(0.012)    | 0.034***<br>(0.010)                   | -0.002<br>(0.015)    | 0.032***<br>(0.010)                   | -0.004<br>(0.016)   | 0.039***<br>(0.009)                                                | 0.007<br>(0.016)     |
| Pregnant               | 0.080**<br>(0.034)                    | 0.015<br>(0.061)     | 0.064*<br>(0.034)                     | 0.005<br>(0.056)     | 0.050<br>(0.035)                                                   | 0.043<br>(0.046)     | 0.073<br>(0.058)                      | 0.115*<br>(0.066)    | 0.067<br>(0.060)                      | 0.115*<br>(0.067)   | 0.038<br>(0.063)                                                   | 0.102<br>(0.073)     |
| Recently lost job      | -0.006<br>(0.018)                     | -0.081***<br>(0.028) | -0.008<br>(0.018)                     | -0.076***<br>(0.029) | -0.001<br>(0.018)                                                  | -0.072***<br>(0.027) | 0.021<br>(0.021)                      | -0.030<br>(0.025)    | 0.019<br>(0.021)                      | -0.041<br>(0.028)   | 0.019<br>(0.022)                                                   | -0.041<br>(0.032)    |
| Obese                  | 0.021***<br>(0.007)                   | 0.013<br>(0.009)     | 0.020***<br>(0.007)                   | 0.011<br>(0.010)     | 0.019***<br>(0.007)                                                | 0.013<br>(0.009)     | -0.038***<br>(0.009)                  | -0.028***<br>(0.010) | -0.042***<br>(0.009)                  | -0.026**<br>(0.011) | -0.040***<br>(0.009)                                               | -0.024**<br>(0.010)  |
| year5                  | 0.031                                 | -0.053**             | 0.113**                               | -0.096***            | -0.027                                                             | 0.480***             | -0.007                                | -0.647***            | 0.055                                 | -0.655***           | 0.088                                                              | -0.160**             |

|                                           |           |           |           |           |         |          |           |           |          |           |         |           |
|-------------------------------------------|-----------|-----------|-----------|-----------|---------|----------|-----------|-----------|----------|-----------|---------|-----------|
|                                           | (0.034)   | (0.025)   | (0.047)   | (0.032)   | (0.063) | (0.031)  | (0.035)   | (0.032)   | (0.045)  | (0.042)   | (0.089) | (0.062)   |
| year6                                     | -0.053*   | -0.054*** | -0.010    | -0.084*** | -0.066  | 0.474*** | -0.122*** | -0.648*** | -0.068   | -0.657*** | -0.066  | -0.137*** |
|                                           | (0.030)   | (0.019)   | (0.047)   | (0.029)   | (0.046) | (0.017)  | (0.047)   | (0.028)   | (0.060)  | (0.037)   | (0.061) | (0.019)   |
| year7                                     | -0.012    | -0.084*** | 0.027     | -0.103*** | -0.029  | 0.446*** | -0.088**  | -0.662*** | -0.039   | -0.660*** | -0.046  | -0.150*** |
|                                           | (0.030)   | (0.021)   | (0.046)   | (0.028)   | (0.044) | (0.022)  | (0.044)   | (0.033)   | (0.057)  | (0.038)   | (0.057) | (0.032)   |
| year8                                     | -0.001    | -0.096*** | 0.038     | -0.110*** | -0.014  | 0.483*** | -0.108**  | -0.548*** | -0.058   | -0.542*** | -0.079  | -0.033    |
|                                           | (0.030)   | (0.033)   | (0.046)   | (0.034)   | (0.044) | (0.025)  | (0.043)   | (0.039)   | (0.057)  | (0.048)   | (0.055) | (0.040)   |
| year9                                     | -0.029    | -0.131*** | 0.011     | -0.148*** | -0.028  | 0.428*** | -0.091**  | -0.619*** | -0.050   | -0.609*** | -0.090* | -0.079    |
|                                           | (0.028)   | (0.029)   | (0.045)   | (0.035)   | (0.043) | (0.030)  | (0.040)   | (0.040)   | (0.054)  | (0.047)   | (0.052) | (0.077)   |
| country3                                  | -0.108*** |           | -0.098*** |           |         |          | -0.105**  |           | -0.091*  |           |         |           |
|                                           | (0.033)   |           | (0.038)   |           |         |          | (0.051)   |           | (0.055)  |           |         |           |
| country7                                  | 0.041**   |           | 0.048*    |           |         |          | 0.103***  |           | 0.096*** |           |         |           |
|                                           | (0.018)   |           | (0.025)   |           |         |          | (0.026)   |           | (0.037)  |           |         |           |
| country8                                  | -0.088*** |           | -0.102*** |           |         |          | -0.011    |           | -0.008   |           |         |           |
|                                           | (0.025)   |           | (0.029)   |           |         |          | (0.029)   |           | (0.038)  |           |         |           |
| country9                                  | -0.052*   |           | -0.056*   |           |         |          | 0.123***  |           | 0.118*** |           |         |           |
|                                           | (0.029)   |           | (0.033)   |           |         |          | (0.035)   |           | (0.041)  |           |         |           |
| country11                                 | -0.006    |           | -0.013    |           |         |          | 0.192***  |           | 0.188*** |           |         |           |
|                                           | (0.018)   |           | (0.025)   |           |         |          | (0.027)   |           | (0.038)  |           |         |           |
| country12                                 | -0.000    |           | 0.002     |           |         |          | 0.034     |           | 0.033    |           |         |           |
|                                           | (0.019)   |           | (0.024)   |           |         |          | (0.026)   |           | (0.033)  |           |         |           |
| country13                                 | -0.036*   |           | -0.041    |           |         |          | -0.051    |           | -0.055   |           |         |           |
|                                           | (0.019)   |           | (0.026)   |           |         |          | (0.038)   |           | (0.047)  |           |         |           |
| country14                                 | -0.109*** |           | -0.098*** |           |         |          | -0.000    |           | 0.007    |           |         |           |
|                                           | (0.025)   |           | (0.034)   |           |         |          | (0.033)   |           | (0.045)  |           |         |           |
| country16                                 | -0.066*** |           | -0.069**  |           |         |          | 0.095***  |           | 0.104**  |           |         |           |
|                                           | (0.021)   |           | (0.027)   |           |         |          | (0.035)   |           | (0.042)  |           |         |           |
| Public health facility available          |           |           | -0.001    | 0.082***  |         |          |           |           | 0.058*   | 0.049     |         |           |
|                                           |           |           | (0.027)   | (0.030)   |         |          |           |           | (0.033)  | (0.034)   |         |           |
| Private health facility available         |           |           | -0.010    | -0.040    |         |          |           |           | -0.020   | 0.011     |         |           |
|                                           |           |           | (0.017)   | (0.025)   |         |          |           |           | (0.021)  | (0.025)   |         |           |
| Any antihypertensive drug available       |           |           | 0.036     | -0.096*** |         |          |           |           | 0.012    | -0.076    |         |           |
|                                           |           |           | (0.066)   | (0.033)   |         |          |           |           | (0.050)  | (0.048)   |         |           |
| Number of antihypertensive drug available |           |           | 0.004     | 0.007     |         |          |           |           | 0.003    | 0.010     |         |           |
|                                           |           |           | (0.006)   | (0.005)   |         |          |           |           | (0.008)  | (0.008)   |         |           |
| Electric street lighting present          |           |           | 0.041     | 0.039*    |         |          |           |           | 0.030    | 0.034     |         |           |
|                                           |           |           | (0.038)   | (0.022)   |         |          |           |           | (0.033)  | (0.029)   |         |           |
| Traffic lights present                    |           |           | -0.003    | -0.014    |         |          |           |           | 0.008    | -0.007    |         |           |
|                                           |           |           | (0.021)   | (0.021)   |         |          |           |           | (0.019)  | (0.030)   |         |           |
| Completeness of road paving               |           |           | 0.006     | 0.014     |         |          |           |           | -0.014   | -0.017    |         |           |
|                                           |           |           | (0.021)   | (0.015)   |         |          |           |           | (0.023)  | (0.020)   |         |           |
| year13                                    | 0.039     | -0.063    |           |           |         |          | -0.051    | -0.202**  |          |           |         |           |
|                                           | (0.071)   | (0.173)   |           |           |         |          | (0.095)   | (0.095)   |          |           |         |           |
| year14                                    | 0.073     | 0.015     |           |           |         |          | -0.212**  | -0.458*** |          |           |         |           |
|                                           | (0.074)   | (0.174)   |           |           |         |          | (0.092)   | (0.096)   |          |           |         |           |
| country20                                 | -0.032    |           |           |           |         |          | 0.232**   |           |          |           |         |           |
|                                           | (0.076)   |           |           |           |         |          | (0.098)   |           |          |           |         |           |
| year10                                    |           | -0.188*** |           | -0.135    |         | -0.009   |           | -0.619*** |          | -0.569*** |         | 0.020     |

|                   |         |           |         |           |         |          |         |           |         |           |         |          |
|-------------------|---------|-----------|---------|-----------|---------|----------|---------|-----------|---------|-----------|---------|----------|
| year11            |         | (0.071)   |         | (0.097)   |         | (0.018)  |         | (0.046)   |         | (0.053)   |         | (0.020)  |
|                   |         | -0.183*** |         | -0.133    |         |          |         | -0.635*** |         | -0.587*** |         |          |
|                   |         | (0.063)   |         | (0.089)   |         |          |         | (0.056)   |         | (0.057)   |         |          |
| country2          |         | -0.046*** |         | -0.023    |         |          |         | -0.133*** |         | -0.095**  |         |          |
|                   |         | (0.016)   |         | (0.026)   |         |          |         | (0.028)   |         | (0.043)   |         |          |
| country4          |         | 0.070***  |         | 0.044*    |         |          |         | 0.009     |         | 0.007     |         |          |
|                   |         | (0.024)   |         | (0.025)   |         |          |         | (0.035)   |         | (0.037)   |         |          |
| country6          |         | -0.277*** |         | -0.254*** |         |          |         | -0.091**  |         | -0.065    |         |          |
|                   |         | (0.027)   |         | (0.048)   |         |          |         | (0.036)   |         | (0.050)   |         |          |
| country10         |         | 0.060***  |         | 0.044*    |         |          |         | -0.019    |         | -0.030    |         |          |
|                   |         | (0.023)   |         | (0.025)   |         |          |         | (0.040)   |         | (0.042)   |         |          |
| country15         |         | -0.171*** |         |           |         |          |         | -0.227*** |         |           |         |          |
|                   |         | (0.048)   |         |           |         |          |         | (0.050)   |         |           |         |          |
| country17         |         | 0.000     |         | 0.016     |         |          |         | -0.018    |         | -0.004    |         |          |
|                   |         | (0.048)   |         | (0.056)   |         |          |         | (0.041)   |         | (0.046)   |         |          |
| country18         |         | -0.701*** |         |           |         |          |         | -0.708*** |         |           |         |          |
|                   |         | (0.121)   |         |           |         |          |         | (0.096)   |         |           |         |          |
| country21         |         | -0.057    |         |           |         |          |         | -0.411*** |         |           |         |          |
|                   |         | (0.174)   |         |           |         |          |         | (0.096)   |         |           |         |          |
| year4             |         |           |         |           |         | 0.541*** |         |           |         |           |         | 0.481*** |
|                   |         |           |         |           |         | (0.030)  |         |           |         |           |         | (0.046)  |
| Constant          | -0.023  | 0.229     | -0.149  | 0.275*    | 0.063   | 0.001    | 0.146   | 0.823***  | 0.038   | 0.860***  | 0.216   | 0.934*** |
|                   | (0.151) | (0.139)   | (0.192) | (0.155)   | (0.174) | (0.141)  | (0.199) | (0.139)   | (0.217) | (0.166)   | (0.240) | (0.156)  |
| Observations      | 12,315  | 11,545    | 11,614  | 10,494    | 11,614  | 10,494   | 12,315  | 11,545    | 11,614  | 10,494    | 11,614  | 10,494   |
| R-squared         | 0.071   | 0.071     | 0.072   | 0.068     | 0.041   | 0.020    | 0.051   | 0.054     | 0.050   | 0.054     | 0.019   | 0.009    |
| Number of epochid |         |           |         |           | 209     | 202      |         |           |         |           | 209     | 202      |

Robust standard errors in parentheses

\*\*\* p<0.01, \*\* p<0.05, \* p<0.1
